# Supplementary material for: Comprehensive characterization of PTEN mutational profile in a series of 34,129 colorectal cancers
Source: PubMed Central journal article supplement (PMC8956741; doi:10.1038/s41467-022-29227-2), 2022-03-25
Supplement: 41467_2022_29227_MOESM1_ESM.pdf [file 41467_2022_29227_MOESM1_ESM.pdf]

**Supplementary Table 1. Age distribution of patients with CRC by site, sex, and MS status (relevant to Figure 1c, Supplementary Figure 1a,b)**

| Age distribution of patients with CRC by site      |    |    |        |    |    |      |
|----------------------------------------------------|----|----|--------|----|----|------|
| site                                               | Q0 | Q1 | median | Q3 | Q4 | mean |
| colon                                              | 8  | 50 | 59     | 68 | 89 | 58.9 |
| rectum                                             | 14 | 49 | 57     | 66 | 89 | 57.1 |
|                                                    |    |    |        |    |    |      |
| Age distribution of patients with CRC by sex       |    |    |        |    |    |      |
| sex                                                | Q0 | Q1 | med    | Q3 | Q4 | mean |
| F                                                  | 12 | 49 | 59     | 68 | 89 | 58.4 |
| M                                                  | 8  | 50 | 59     | 68 | 89 | 58.7 |
|                                                    |    |    |        |    |    |      |
| Age distribution of patients with CRC by MS cohort |    |    |        |    |    |      |
| MS cohort                                          | Q0 | Q1 | median | Q3 | Q4 | mean |
| MT-H                                               | 8  | 51 | 64     | 75 | 89 | 62.4 |
| MT-L                                               | 8  | 50 | 59     | 67 | 89 | 58.4 |
| MSS htmb                                           | 16 | 44 | 55     | 65 | 87 | 53.8 |

**Supplementary Table 2. Sex distribution of patients, by MS status (relevant to Figure 1d)**

Significance was calculated using 2-sample test for equality of proportions with continuity correction (prop.test function in R).

| MS cohort | sex | count | fraction | comparison       | p-value  |
|-----------|-----|-------|----------|------------------|----------|
| MT-H      | F   | 812   | 0.507    | MT-H to MT-L     | 2.92E-06 |
| MT-H      | M   | 791   | 0.493    |                  |          |
| MT-L      | F   | 14389 | 0.447    | MT-L to MSS htmb | 0.000377 |
| MT-L      | M   | 17823 | 0.553    |                  |          |
| MSS htmb  | F   | 80    | 0.331    | MSS htmb to MT-H | 4.73E-07 |
| MSS htmb  | M   | 162   | 0.669    |                  |          |

**Supplementary Table 3. Distribution of tumor subsites, by MS status (relevant to Figure 1e)**

Significance was calculated using 2-sample test for equality of proportions with continuity correction (prop.test function in R).

| MS cohort | site   | count | fraction | comparison       | p-value  |
|-----------|--------|-------|----------|------------------|----------|
| MT-H      | colon  | 1526  | 0.952    | MT-H to MT-L     | 5.60E-37 |
| MT-H      | rectum | 77    | 0.048    |                  |          |
| MT-L      | colon  | 26807 | 0.832    | MT-L to MSS htmb | 0.561    |
| MT-L      | rectum | 5426  | 0.168    |                  |          |
| MSS htmb  | colon  | 206   | 0.848    | MSS htmb to MT-H | 7.90E-10 |
| MSS htmb  | rectum | 37    | 0.152    |                  |          |

**Supplementary Table 4. Prevalence of PTEN mutations in CRC cohorts (relevant to Figure 2b)**

| Column       | Description                                                        |
|--------------|--------------------------------------------------------------------|
| MS cohort    | status assigned by integrating microsatellite instability and TMB. |
| samples      | counts of samples                                                  |
| single_pten  | counts of samples carrying a single PTEN alterations               |
| mult_pten    | counts of samples carrying multiple PTEN alterations               |
| any_pten     | counts of samples carrying at least one PTEN alteration            |
| fract_single | fraction of samples carrying a single PTEN alterations             |
| fract_mult   | fraction of samples carrying multiple PTEN alterations             |
| fraction_any | fraction of samples carrying at least one PTEN alteration          |

Confidence intervals for a population proportion, as well as significance of difference between proportions (using 2-sample test for equality of proportions with continuity correction) were calculated based on the data for any PTEN alterations, using prop.test function in R.

| MS cohort | patients | Samples with PTEN alterations, count |      |      | Samples with PTEN alterations, fraction |       |       | Confidence intervals comb |       | comparisons      |           |
|-----------|----------|--------------------------------------|------|------|-----------------------------------------|-------|-------|---------------------------|-------|------------------|-----------|
|           |          | Single                               | Mult | Any  | Single                                  | Mult  | Any   | lower                     | upper | groups           | p-value   |
| MT-H      | 1603     | 211                                  | 189  | 400  | 0.132                                   | 0.118 | 0.250 | 0.229                     | 0.272 | MT-H to MT-L     | 8.80E-132 |
| MT-L      | 32233    | 2301                                 | 137  | 2438 | 0.071                                   | 0.004 | 0.076 | 0.073                     | 0.079 | MT-L to MSS htmb | 5.29E-104 |
| MSS htmb  | 243      | 43                                   | 67   | 110  | 0.177                                   | 0.276 | 0.453 | 0.389                     | 0.518 | MSS htmb to MT-H | 6.70E-11  |

**Supplementary Table 5. Prevalence of PTEN mutations in CRC cohorts by sex (relevant to Fig.2d)**

| MS cohort | sex | PTEN alt | PTEN wt | Fraction pten | ConfL  | ConfU  | p-value by sex |
|-----------|-----|----------|---------|---------------|--------|--------|----------------|
| MT-H      | F   | 211      | 600     | 0.260         | 0.2306 | 0.2921 | 0.3399         |
| MT-H      | M   | 188      | 601     | 0.238         | 0.2093 | 0.2699 |                |
| MT-L      | F   | 1290     | 13099   | 0.090         | 0.0851 | 0.0945 | 2.00E-17       |
| MT-L      | M   | 1148     | 16675   | 0.064         | 0.0609 | 0.0681 |                |
| MSS htmb  | F   | 28       | 52      | 0.350         | 0.2490 | 0.4656 | 0.0309         |
| MSS htmb  | M   | 82       | 80      | 0.506         | 0.4269 | 0.5851 |                |

**Supplementary Table 6. Prevalence of PTEN mutations in CRC cohorts by tumor subsite (relevant to Fig.2e)**

| MS cohort | sex    | PTEN alt | PTEN wt | Fraction pten | ConfL | ConfU | p-value by site |
|-----------|--------|----------|---------|---------------|-------|-------|-----------------|
| MT-H      | colon  | 381      | 1142    | 0.250         | 0.229 | 0.273 | 0.85            |
| MT-H      | rectum | 18       | 59      | 0.234         | 0.148 | 0.347 |                 |
| MT-L      | colon  | 2138     | 24669   | 0.080         | 0.077 | 0.083 | 6.11E-10        |
| MT-L      | rectum | 300      | 5126    | 0.055         | 0.049 | 0.062 |                 |
| MSS htmb  | colon  | 96       | 110     | 0.466         | 0.397 | 0.537 | 0.42            |
| MSS htmb  | rectum | 14       | 23      | 0.378         | 0.229 | 0.552 |                 |

**Supplementary Table 7. PTEN alteration trends by age and MS cohort (relevant to Fig.2f)**

Logistic regression coefficients and p-values were calculated using the glm function in R

| MS cohort | PTEN alt | wt    | reg_coef | p_value |
|-----------|----------|-------|----------|---------|
| MT-H      | 400      | 1203  | 0.00067  | 0.32366 |
| MT-L      | 2438     | 29795 | 0.00062  | 1.6E-07 |
| MSS htmb  | 110      | 133   | -0.0072  | 0.00067 |

**Supplementary Table 8. PTEN alteration trends by age, MS cohort, and tumor subsite (relevant to Supplementary Fig.2, bdf)**

Logistic regression coefficients and p-values were calculated using the glm function in R

| Assigned | site   | PTEN alt | wt    | reg_coef  | p_value  |
|----------|--------|----------|-------|-----------|----------|
| MT-H     | colon  | 381      | 1142  | 0.000933  | 0.190803 |
| MT-H     | rectum | 18       | 59    | -0.005512 | 0.076489 |
| MT-L     | colon  | 2138     | 24669 | 0.000571  | 0.000014 |
| MT-L     | rectum | 300      | 5126  | 0.000663  | 0.008633 |
| MSS htmb | colon  | 96       | 110   | -0.006711 | 0.003187 |
| MSS htmb | rectum | 14       | 23    | -0.011004 | 0.050463 |

**Supplementary Table 9. PTEN alteration trends by age, MS cohort and sex (relevant to Supplementary Fig.2, ceg)**

Logistic regression coefficients and p-values were calculated using the glm function in R

| Assigned | sex | PTEN alt | wt    | reg_coef  | p_value  |
|----------|-----|----------|-------|-----------|----------|
| MT-H     | F   | 211      | 600   | -0.000464 | 0.657156 |
| MT-H     | M   | 188      | 601   | 0.001416  | 0.135962 |
| MT-L     | F   | 1290     | 13099 | 0.000756  | 0.000051 |
| MT-L     | M   | 1148     | 16675 | 0.000555  | 0.000187 |
| MSS htmb | F   | 28       | 52    | -0.005393 | 0.112681 |
| MSS htmb | M   | 82       | 80    | -0.007459 | 0.005152 |

**Supplementary Table 10. Major PTEN alteration classes, by MS cohort (relevant to Fig.2g)**

| MS cohort | alteration_Class | count | fraction in cohort |
|-----------|------------------|-------|--------------------|
| MT-H      | deletion         | 1     | 0.00165            |
| MT-H      | missense_indel   | 177   | 0.292              |
| MT-H      | truncation       | 429   | 0.707              |
| MT-L      | amplification    | 1     | 0.000387           |
| MT-L      | deletion         | 1055  | 0.408              |
| MT-L      | missense_indel   | 640   | 0.248              |
| MT-L      | rearrangement    | 38    | 0.0147             |
| MT-L      | truncation       | 851   | 0.329              |
| MSS htmb  | deletion         | 5     | 0.0234             |
| MSS htmb  | missense_indel   | 132   | 0.617              |
| MSS htmb  | truncation       | 77    | 0.36               |

**Supplementary Table 11. Major PTEN alteration classes, in MT-L and MT-H cohorts, by sex (relevant to Supplementary Fig.2h)**

| <b>MS cohort</b> | <b>sex</b> | <b>alteration_Class</b>   | <b>n_samples</b> |
|------------------|------------|---------------------------|------------------|
| MT-H             | F          | deletion                  | 1                |
| MT-H             | F          | missense & inframe indels | 99               |
| MT-H             | F          | truncation                | 208              |
| MT-H             | M          | missense & inframe indels | 78               |
| MT-H             | M          | truncation                | 219              |
| MT-L             | F          | deletion                  | 569              |
| MT-L             | F          | other                     | 20               |
| MT-L             | F          | missense & inframe indels | 326              |
| MT-L             | F          | truncation                | 452              |
| MT-L             | M          | deletion                  | 486              |
| MT-L             | M          | other                     | 19               |
| MT-L             | M          | missense & inframe indels | 314              |
| MT-L             | M          | truncation                | 399              |

**Supplementary Table 12. Major PTEN alteration classes, in MT-L and MT-H cohorts, by tumor subsite (relevant to Supplementary Fig.2i)**

| <b>MS cohort</b> | <b>site</b> | <b>alteration_Class</b>   | <b>n_samples</b> |
|------------------|-------------|---------------------------|------------------|
| MT-H             | colon       | deletion                  | 1                |
| MT-H             | colon       | missense & inframe indels | 168              |
| MT-H             | colon       | truncation                | 410              |
| MT-H             | rectum      | missense & inframe indels | 9                |
| MT-H             | rectum      | truncation                | 17               |
| MT-L             | colon       | deletion                  | 927              |
| MT-L             | colon       | other                     | 34               |
| MT-L             | colon       | missense & inframe indels | 553              |
| MT-L             | colon       | truncation                | 756              |
| MT-L             | rectum      | deletion                  | 128              |
| MT-L             | rectum      | other                     | 5                |
| MT-L             | rectum      | missense & inframe indels | 87               |
| MT-L             | rectum      | truncation                | 95               |

**Supplementary Table 13. Major PTEN alteration classes, in MT-L and MT-H cohorts, by age (relevant to Supplementary Fig.2j)**

In each of the MTL and MTH subsets, the samples with PTEN alterations were ranked by age and split into three equal groups.

| Age group | alteration_Class          | n_samples MTL | n_samples MTH |
|-----------|---------------------------|---------------|---------------|
| 1         | deletion                  | 293           | 0             |
| 1         | other                     | 15            | 0             |
| 1         | missense & inframe indels | 164           | 45            |
| 1         | truncation                | 256           | 146           |
| 2         | deletion                  | 347           | 0             |
| 2         | other                     | 10            | 0             |
| 2         | missense & inframe indels | 231           | 67            |
| 2         | truncation                | 298           | 138           |
| 3         | deletion                  | 401           | 1             |
| 3         | other                     | 13            | 0             |
| 3         | missense & inframe indels | 237           | 68            |
| 3         | truncation                | 287           | 137           |

**Supplementary Table 14. PTEN post-translational modifications (relevant to Fig.3a)**

References are given as PMIDs

| Amino Acid | Modification    | Ref.1    | Ref.2    | Ref.3    | Ref.4    | UNIPROT |
|------------|-----------------|----------|----------|----------|----------|---------|
| K13        | ubiquitination  | 17218261 |          |          |          | YES     |
| K63        | ubiquitination  | 34416231 |          |          |          | NO      |
| C83        | S-nitrosylation | 21646525 |          |          |          | NO      |
| K125       | acetylation     | 16829519 |          |          |          | NO      |
| K128       | acetylation     | 16829519 |          |          |          | NO      |
| K163       | acetylation     | 26279303 |          |          |          | NO      |
| S229       | phosphorylation | 15793569 |          |          |          | NO      |
| Y240       | phosphorylation | 30827889 |          |          |          | NO      |
| K254       | SUMOylation     | 23888040 | 22713753 |          |          | NO      |
| K266       | SUMOylation     | 23888040 | 22713753 | 23013792 | 22713753 | NO      |
| K289       | ubiquitination  | 17218261 |          |          |          | YES     |
| T321       | phosphorylation | 15793569 |          |          |          | NO      |
| Y336       | phosphorylation | 19345329 |          |          |          | YES     |
| T366       | phosphorylation | 12297295 | 20940307 |          |          | YES     |
| S370       | phosphorylation | 12297295 | 20940307 | 11035045 |          | YES     |
| S380       | phosphorylation | 24706748 |          |          |          | YES     |
| T382       | phosphorylation | 11035045 | 24706748 |          |          | YES     |
| T383       | phosphorylation | 11035045 | 24706748 |          |          | YES     |
| S385       | phosphorylation | 11035045 | 12297295 |          |          | YES     |
| T398       | phosphorylation | 23888040 |          |          |          | NO      |
| T401       | phosphorylation | 10646847 |          |          |          | YES     |
| K402       | acetylation     | 18757404 |          |          |          | NO      |

**Supplementary Table 15. PTEN single-residue hotspots, by MS/TMB cohort**

| Column                  | Description                                                                                            |
|-------------------------|--------------------------------------------------------------------------------------------------------|
| Counts                  | number of mutations in a given codon.                                                                  |
| as % in                 | share of mutations in a given codon among all mutations in cohort                                      |
| found in cancerhotspots | whether or not this hotspot was identified in the pancancer cohort, as available on cancerhotspots.org |
| Cutoff (top line):      | cutoffs calculated using binomial distribution for the p-value 0.005                                   |

| cutoff | 9          | 8          | 5          | 4               |              |             |             |                  |                         |
|--------|------------|------------|------------|-----------------|--------------|-------------|-------------|------------------|-------------------------|
| Codon  | Counts all | Counts MTL | Counts MTH | Counts MSS htmb | as % overall | as % in MTL | as % in MTH | as % in MSS htmb | found in cancerhotspots |
| 130    | 177        | 108        | 27         | 41              | 8%           | 8%          | 5%          | 20%              | Y                       |
| 267    | 133        | 3          | 129        | 0               | 6%           | 0%          | 22%         | 0%               | Y                       |
| 173    | 111        | 67         | 27         | 15              | 5%           | 5%          | 5%          | 7%               | Y                       |
| 323    | 96         | 20         | 76         | 0               | 5%           | 2%          | 13%         | 0%               | n                       |
| 233    | 95         | 65         | 27         | 2               | 4%           | 5%          | 5%          | 1%               | Y                       |
| 319    | 62         | 54         | 7          | 1               | 3%           | 4%          | 1%          | 0%               | n                       |
| 299    | 33         | 6          | 1          | 25              | 2%           | 0%          | 0%          | 12%              | n                       |
| 157    | 30         | 9          | 21         | 0               | 1%           | 1%          | 4%          | 0%               | n                       |
| 7      | 29         | 5          | 0          | 23              | 1%           | 0%          | 0%          | 11%              | n                       |
| 268    | 28         | 7          | 20         | 1               | 1%           | 1%          | 3%          | 0%               | Y                       |
| 136    | 24         | 21         | 3          | 0               | 1%           | 2%          | 1%          | 0%               | Y                       |
| 33     | 22         | 15         | 7          | 0               | 1%           | 1%          | 1%          | 0%               | n                       |
| 68     | 22         | 18         | 4          | 0               | 1%           | 1%          | 1%          | 0%               | Y                       |
| 335    | 22         | 16         | 6          | 0               | 1%           | 1%          | 1%          | 0%               | Y                       |
| 27     | 18         | 16         | 2          | 0               | 1%           | 1%          | 0%          | 0%               | Y                       |
| 57     | 18         | 9          | 9          | 0               | 1%           | 1%          | 2%          | 0%               | n                       |
| 63     | 18         | 3          | 13         | 1               | 1%           | 0%          | 2%          | 0%               | n                       |
| 290    | 18         | 5          | 12         | 1               | 1%           | 0%          | 2%          | 0%               | n                       |
| 36     | 17         | 14         | 2          | 1               | 1%           | 1%          | 0%          | 0%               | n                       |
| 16     | 16         | 15         | 1          | 0               | 1%           | 1%          | 0%          | 0%               | Y                       |
| 165    | 16         | 14         | 2          | 0               | 1%           | 1%          | 0%          | 0%               | Y                       |
| 126    | 15         | 13         | 2          | 0               | 1%           | 1%          | 0%          | 0%               | Y                       |
| 93     | 14         | 12         | 2          | 0               | 1%           | 1%          | 0%          | 0%               | Y                       |
| 246    | 14         | 12         | 1          | 1               | 1%           | 1%          | 0%          | 0%               | n                       |
| 15     | 12         | 7          | 1          | 4               | 1%           | 1%          | 0%          | 2%               | n                       |
| 17     | 12         | 12         | 0          | 0               | 1%           | 1%          | 0%          | 0%               | n                       |
| 127    | 12         | 11         | 1          | 0               | 1%           | 1%          | 0%          | 0%               | Y                       |
| 134    | 12         | 6          | 3          | 3               | 1%           | 0%          | 1%          | 1%               | n                       |
| 155    | 12         | 10         | 2          | 0               | 1%           | 1%          | 0%          | 0%               | Y                       |
| 171    | 12         | 12         | 0          | 0               | 1%           | 1%          | 0%          | 0%               | Y                       |
| 274    | 12         | 7          | 5          | 0               | 1%           | 1%          | 1%          | 0%               | Y                       |
| 24     | 11         | 8          | 2          | 1               | 1%           | 1%          | 0%          | 0%               | Y                       |
| 111    | 11         | 9          | 2          | 0               | 1%           | 1%          | 0%          | 0%               | Y                       |
| 129    | 11         | 8          | 3          | 0               | 1%           | 1%          | 1%          | 0%               | Y                       |
| 142    | 11         | 5          | 0          | 5               | 1%           | 0%          | 0%          | 2%               | n                       |
| 320    | 11         | 11         | 0          | 0               | 1%           | 1%          | 0%          | 0%               | Y                       |
| 336    | 11         | 8          | 0          | 3               | 1%           | 1%          | 0%          | 1%               | Y                       |
| 66     | 10         | 5          | 0          | 4               | 0%           | 0%          | 0%          | 2%               | n                       |
| 92     | 10         | 6          | 0          | 3               | 0%           | 0%          | 0%          | 1%               | Y                       |
| 96     | 10         | 3          | 7          | 0               | 0%           | 0%          | 1%          | 0%               | n                       |
| 101    | 10         | 9          | 1          | 0               | 0%           | 1%          | 0%          | 0%               | Y                       |
| 105    | 10         | 7          | 3          | 0               | 0%           | 1%          | 1%          | 0%               | Y                       |
| 146    | 10         | 6          | 4          | 0               | 0%           | 0%          | 1%          | 0%               | Y                       |
| 164    | 10         | 0          | 9          | 1               | 0%           | 0%          | 2%          | 0%               | n                       |
| 211    | 10         | 8          | 2          | 0               | 0%           | 1%          | 0%          | 0%               | n                       |
| 277    | 10         | 9          | 1          | 0               | 0%           | 1%          | 0%          | 0%               | Y                       |
| 31     | 9          | 6          | 2          | 0               | 0%           | 0%          | 0%          | 0%               | n                       |
| 35     | 9          | 9          | 0          | 0               | 0%           | 1%          | 0%          | 0%               | Y                       |
| 38     | 9          | 9          | 0          | 0               | 0%           | 1%          | 0%          | 0%               | Y                       |
| 76     | 9          | 5          | 4          | 0               | 0%           | 0%          | 1%          | 0%               | n                       |
| 90     | 9          | 1          | 8          | 0               | 0%           | 0%          | 1%          | 0%               | n                       |
| 123    | 9          | 8          | 0          | 1               | 0%           | 1%          | 0%          | 0%               | n                       |
| 159    | 9          | 8          | 1          | 0               | 0%           | 1%          | 0%          | 0%               | n                       |
| 170    | 9          | 6          | 2          | 0               | 0%           | 0%          | 0%          | 0%               | Y                       |
| 124    | 8          | 8          | 0          | 0               | 0%           | 1%          | 0%          | 0%               | Y                       |
| 219    | 8          | 8          | 0          | 0               | 0%           | 1%          | 0%          | 0%               | n                       |
| 298    | 8          | 8          | 0          | 0               | 0%           | 1%          | 0%          | 0%               | n                       |
| 41     | 7          | 3          | 0          | 4               | 0%           | 0%          | 0%          | 2%               | n                       |
| 183    | 6          | 2          | 0          | 4               | 0%           | 0%          | 0%          | 2%               | n                       |
| 341    | 8          | 3          | 0          | 4               | 0%           | 0%          | 0%          | 2%               | n                       |

**Supplementary Table 16. Percent of major PTEN mutational single-residue hotspots, by MS/TMB cohort (relevant to Fig.3b)**

|                            | Hotspots<br>MTL | Hotspots<br>MTH | Hotspots<br>MSS htmb |
|----------------------------|-----------------|-----------------|----------------------|
| non-hotspot mut            | 49.1            | 29.4            | 36.5                 |
| R130                       | 8.2             | 4.6             | 20.2                 |
| R173                       | 5.1             | 4.6             | 7.4                  |
| R233                       | 4.9             | 4.6             |                      |
| T319                       | 4.1             |                 |                      |
| K267                       |                 | 22.2            |                      |
| N323                       |                 | 13.1            |                      |
| E157                       |                 | 3.6             |                      |
| D268                       |                 | 3.4             |                      |
| E299                       |                 |                 | 12.3                 |
| E7                         |                 |                 | 11.3                 |
| other hotspots<br>combined | 32.7            | 14.5            | 12.3                 |

**Supplementary Table 17. Age trends for mutational signatures in MT-L and MT-H cohorts (relevant to Fig.4b).** Regression coefficients and p-values were calculated using generalized linear model (glm function in R).

| <b>MT-L</b>        |                 |           |                 |                |
|--------------------|-----------------|-----------|-----------------|----------------|
| <b>signature</b>   | <b>PTEN alt</b> | <b>wt</b> | <b>reg_coef</b> | <b>p_value</b> |
| <b>IDT_count</b>   | 60              | 32173     | 3.46E-05        | 0.07011        |
| <b>PTEN_count</b>  | 2589            | 29791     | 0.000634        | 7.70E-07       |
| <b>PTEN_nonsig</b> | 2265            | 30074     | 0.000575        | 1.44E-06       |
| <b>SBS1_count</b>  | 264             | 31972     | 2.42E-05        | 0.54931        |

| <b>MT-H</b>        |                 |           |                 |                |
|--------------------|-----------------|-----------|-----------------|----------------|
| <b>signature</b>   | <b>PTEN alt</b> | <b>wt</b> | <b>reg_coef</b> | <b>p_value</b> |
| <b>IDT_count</b>   | 286             | 1370      | -8.96E-05       | 0.90317        |
| <b>PTEN_count</b>  | 608             | 1198      | 0.000719        | 0.52818        |
| <b>PTEN_nonsig</b> | 224             | 1403      | 0.000533        | 0.40021        |
| <b>SBS1_count</b>  | 98              | 1506      | 0.000276        | 0.48141        |



**Supplementary Table 18. Mutational signatures primarily associated with single-residue hotspots, by MS/TMB cohort (relevant to Fig.4c)**

| PTEN MT-L |           |          |                        | PTEN MT-H |           |          |                        | PTEN MSS htmb |           |          |                    |
|-----------|-----------|----------|------------------------|-----------|-----------|----------|------------------------|---------------|-----------|----------|--------------------|
| Codon     | mut count | % of mut | Mut signature          | Codon     | mut count | % of mut | Mut signature          | Codon         | mut count | % of mut | Mut signature      |
| 130       | 108       | 8.2%     | <b>SBS1</b>            | 267       | 129       | 22.2%    | <b>IDT</b>             | 130           | 41        | 20%      | <b>SBS10b/SBS1</b> |
| 173       | 67        | 5.1%     | <b>SBS1</b>            | 323       | 76        | 13.1%    | <b>IDT</b>             | 299           | 25        | 12%      | <b>SBS10a</b>      |
| 233       | 65        | 4.9%     | <b>SBS1</b>            | 130       | 27        | 4.6%     | <b>SBS1</b>            | 7             | 23        | 11%      | <b>SBS10a</b>      |
| 319       | 54        | 4.1%     | <b>repeat deletion</b> | 173       | 27        | 4.6%     | <b>SBS1</b>            | 173           | 15        | 7%       | <b>SBS1</b>        |
| 136       | 21        | 1.6%     |                        | 233       | 27        | 4.6%     | <b>SBS1</b>            | 142           | 5         | 2%       | <b>SBS10b/SBS1</b> |
| 323       | 20        | 1.5%     | <b>IDT</b>             | 157       | 21        | 3.6%     | <b>IDT</b>             | 15            | 4         | 2%       | <b>SBS10b</b>      |
| 68        | 18        | 1.4%     |                        | 268       | 20        | 3.4%     | <b>IDT</b>             | 41            | 4         | 2%       | <b>SBS10a</b>      |
| 27        | 16        | 1.2%     |                        | 63        | 13        | 2.2%     | <b>IDT</b>             | 66            | 4         | 2%       |                    |
| 335       | 16        | 1.2%     | <b>SBS1</b>            | 290       | 12        | 2.1%     | <b>IDT</b>             | 183           | 4         | 2%       | <b>SBS10a</b>      |
| 16        | 15        | 1.1%     |                        | 57        | 9         | 1.5%     | <b>IDT</b>             | 341           | 4         | 2%       | <b>SBS28</b>       |
| 33        | 15        | 1.1%     | <b>repeat deletion</b> | 164       | 9         | 1.5%     | <b>IDT</b>             |               |           |          |                    |
| 36        | 14        | 1.1%     |                        | 90        | 8         | 1.4%     | <b>IDT</b>             |               |           |          |                    |
| 165       | 14        | 1.1%     |                        | 33        | 7         | 1.2%     | <b>repeat deletion</b> |               |           |          |                    |
| 126       | 13        | 1.0%     |                        | 96        | 7         | 1.2%     |                        |               |           |          |                    |
| 17        | 12        | 0.9%     |                        | 319       | 7         | 1.2%     | <b>repeat deletion</b> |               |           |          |                    |
| 93        | 12        | 0.9%     |                        | 335       | 6         | 1.0%     | <b>SBS1</b>            |               |           |          |                    |
| 171       | 12        | 0.9%     |                        | 274       | 5         | 0.9%     | <b>IDT</b>             |               |           |          |                    |
| 246       | 12        | 0.9%     |                        |           |           |          |                        |               |           |          |                    |
| 127       | 11        | 0.8%     |                        |           |           |          |                        |               |           |          |                    |
| 320       | 11        | 0.8%     |                        |           |           |          |                        |               |           |          |                    |
| 155       | 10        | 0.8%     |                        |           |           |          |                        |               |           |          |                    |
| 35        | 9         | 0.7%     |                        |           |           |          |                        |               |           |          |                    |
| 38        | 9         | 0.7%     |                        |           |           |          |                        |               |           |          |                    |
| 57        | 9         | 0.7%     | <b>IDT</b>             |           |           |          |                        |               |           |          |                    |
| 101       | 9         | 0.7%     |                        |           |           |          |                        |               |           |          |                    |
| 111       | 9         | 0.7%     |                        |           |           |          |                        |               |           |          |                    |
| 157       | 9         | 0.7%     |                        |           |           |          |                        |               |           |          |                    |
| 277       | 9         | 0.7%     |                        |           |           |          |                        |               |           |          |                    |
| 24        | 8         | 0.6%     |                        |           |           |          |                        |               |           |          |                    |
| 123       | 8         | 0.6%     |                        |           |           |          |                        |               |           |          |                    |
| 124       | 8         | 0.6%     |                        |           |           |          |                        |               |           |          |                    |
| 129       | 8         | 0.6%     |                        |           |           |          |                        |               |           |          |                    |
| 159       | 8         | 0.6%     |                        |           |           |          |                        |               |           |          |                    |
| 211       | 8         | 0.6%     |                        |           |           |          |                        |               |           |          |                    |
| 219       | 8         | 0.6%     |                        |           |           |          |                        |               |           |          |                    |

**Supplementary Table 19. Truncations prior to aa 352, by MS/TMB cohort**

| MS cohort       | Truncations 1:352 | non-truncations | total | fraction of truncations | fraction of non-truncations |
|-----------------|-------------------|-----------------|-------|-------------------------|-----------------------------|
| <b>MT-H</b>     | 669               | 1920            | 2589  | 0.26                    | 0.74                        |
| <b>MT-L</b>     | 403               | 207             | 610   | 0.66                    | 0.34                        |
| <b>MSS htmb</b> | 71                | 143             | 214   | 0.33                    | 0.67                        |

**Supplementary Table 20. PTEN single-residue mutation hotspots, only considering missense/indels, by MS/TMB cohort (relevant to Fig.5, Supplementary Figs 7ab, 9acde)**

| <b>Codon</b> | <b>All cohorts, M/I only</b> | <b>MTL, M/I only</b> | <b>MT-H, M/I only</b> | <b>MSS htmb, M/I only</b> |
|--------------|------------------------------|----------------------|-----------------------|---------------------------|
| 173          | 110                          | 66                   | 27                    | 15                        |
| 130          | 91                           | 41                   | 10                    | 39                        |
| 33           | 22                           | 15                   | 7                     | NA                        |
| 136          | 20                           | 17                   | NA                    | NA                        |
| 68           | 16                           | 12                   | 4                     | NA                        |
| 126          | 15                           | 13                   | NA                    | NA                        |
| 27           | 14                           | 12                   | NA                    | NA                        |
| 36           | 14                           | 11                   | NA                    | NA                        |
| 93           | 14                           | 12                   | NA                    | NA                        |
| 246          | 14                           | 12                   | NA                    | NA                        |
| 155          | 12                           | 10                   | NA                    | NA                        |
| 15           | 11                           | 6                    | NA                    | 4                         |
| 24           | 11                           | 8                    | NA                    | NA                        |
| 142          | 11                           | NA                   | NA                    | 5                         |
| 165          | 11                           | 10                   | NA                    | NA                        |
| 127          | 10                           | 9                    | NA                    | NA                        |
| 129          | 10                           | 8                    | NA                    | NA                        |
| 134          | 10                           | NA                   | NA                    | NA                        |
| 31           | 9                            | 6                    | NA                    | NA                        |
| 35           | 9                            | 9                    | NA                    | NA                        |
| 66           | 9                            | NA                   | NA                    | 4                         |
| 92           | 9                            | NA                   | NA                    | NA                        |
| 96           | 9                            | NA                   | 7                     | NA                        |
| 123          | 9                            | 8                    | NA                    | NA                        |
| 159          | 9                            | 8                    | NA                    | NA                        |
| 38           | 8                            | 8                    | NA                    | NA                        |
| 47           | 8                            | 6                    | NA                    | NA                        |
| 101          | 8                            | 7                    | NA                    | NA                        |
| 124          | 8                            | 8                    | NA                    | NA                        |
| 170          | 8                            | NA                   | NA                    | NA                        |
| 252          | 8                            | 6                    | NA                    | NA                        |
| 76           | 7                            | NA                   | 4                     | NA                        |
| 95           | 7                            | 6                    | NA                    | NA                        |
| 128          | 7                            | 6                    | NA                    | NA                        |
| 131          | 7                            | 7                    | NA                    | NA                        |
| 132          | 7                            | 6                    | NA                    | NA                        |
| 277          | 7                            | 6                    | NA                    | NA                        |
| 45           | 6                            | NA                   | 4                     | NA                        |
| 105          | 6                            | 6                    | NA                    | NA                        |
| 138          | 6                            | NA                   | NA                    | NA                        |
| 171          | 6                            | 6                    | NA                    | NA                        |
| 234          | NA                           | NA                   | 4                     | NA                        |
| 41           | NA                           | NA                   | NA                    | 4                         |
| 183          | NA                           | NA                   | NA                    | 4                         |
| 341          | NA                           | NA                   | NA                    | 4                         |

**Supplementary Table 21. Distribution of LPA scores by cohort (relevant to Fig.6a, Supplementary Fig. 10ab).**

| MS cohort | sex |     | site  |        | total in cohort | box plot stats |         |        |          |              | comparison       |          |          |
|-----------|-----|-----|-------|--------|-----------------|----------------|---------|--------|----------|--------------|------------------|----------|----------|
|           | F   | M   | colon | rectum |                 | low whisker    | low box | median | high box | high whisker | Comp. groups     | t.test   | ks.test  |
| MT-H      | 131 | 101 | 220   | 12     | 232             | -4.79          | -3.49   | -2.04  | -1.26    | 0.41         | MT-H to MT-L     | 4.75E-04 | 0.001    |
| MT-L      | 481 | 447 | 812   | 116    | 928             | -5.41          | -3.58   | -2.69  | -1.43    | 1.73         | MT-L to MSS htmb | 5.57E-04 | 3.08E-10 |
| MSS htmb  | 50  | 145 | 167   | 28     | 195             | -5.69          | -3.38   | -2.04  | -1.26    | 0.56         | MSS htmb to MT-H | 0.647    | 0.005    |

**Supplementary Table 22. Distribution of abundance scores by cohort (relevant to Fig.6b, Supplementary Fig. 10cd).**

| MS cohort | sex |     | site  |        | total in cohort | box plot stats |         |        |          |              | comparison       |        |          |
|-----------|-----|-----|-------|--------|-----------------|----------------|---------|--------|----------|--------------|------------------|--------|----------|
|           | F   | M   | colon | rectum |                 | low whisker    | low box | median | high box | high whisker | Comp. groups     | t.test | ks.test  |
| MT-H      | 51  | 41  | 85    | 7      | 92              | -0.08          | 0.29    | 0.33   | 0.70     | 1.24         | MT-H to MT-L     | 0.8    | 0.3      |
| MT-L      | 243 | 198 | 387   | 54     | 441             | -0.12          | 0.25    | 0.33   | 0.80     | 1.31         | MT-L to MSS htmb | 0.5    | 2.84E-04 |
| MSS htmb  | 16  | 68  | 73    | 11     | 84              | -0.05          | 0.16    | 0.32   | 0.73     | 1.24         | MSS htmb to MT-H | 0.4    | 5.57E-05 |

**Supplementary Table 23. Distribution of LPA and abundance scores based on hotspot status (relevant to Fig.6gh).**

| boxplot stats               | LPA non-hotspot       | LPA hotspot       |
|-----------------------------|-----------------------|-------------------|
| sample size                 | 346                   | 582               |
| low whisker                 | -5.685                | -5.41             |
| low box                     | -3.488                | -3.579            |
| median                      | -2.2255               | -2.472            |
| high box                    | -0.718                | -1.484            |
| high whisker                | 1.727                 | 1.295             |
| <b>Comparison (p-value)</b> |                       |                   |
| ks.test                     | 6.84E-07              |                   |
| t.test                      | 0.003083              |                   |
| boxplot stats               | abundance non-hotspot | abundance hotspot |
| sample size                 | 181                   | 260               |
| low whisker                 | -0.124                | -0.081            |
| low box                     | 0.21                  | 0.255             |
| median                      | 0.481                 | 0.29              |
| high box                    | 0.8355                | 0.64              |
| high whisker                | 1.312                 | 1.205             |
| <b>Comparison (p-value)</b> |                       |                   |
| ks.test                     | 0.0001618             |                   |
| t.test                      | 0.04735               |                   |

**Supplementary Table 21. Distribution of LPA scores by cohort (relevant to Fig.6a, Supplementary Fig. 10ab).** Statistical significance was calculated using Welch's unequal variances t-test and Kolmogorov-Smirnov test.

| MS cohort | sex |     | site  |        | total in cohort | box plot stats |         |        |          |              | comparison       |          |          |
|-----------|-----|-----|-------|--------|-----------------|----------------|---------|--------|----------|--------------|------------------|----------|----------|
|           | F   | M   | colon | rectum |                 | low whisker    | low box | median | high box | high whisker | Comp. groups     | t.test   | ks.test  |
| MT-H      | 127 | 96  | 211   | 12     | 223             | -4.8           | -3.5    | -2     | -1.3     | 0.4          | MT-H to MT-L     | 4.75E-04 | 0.001    |
| MT-L      | 475 | 440 | 800   | 115    | 915             | -5.4           | -3.6    | -2.7   | -1.4     | 1.7          | MT-L to MSS htmb | 5.57E-04 | 3.08E-10 |
| MSS htmb  | 50  | 145 | 167   | 28     | 195             | -5.7           | -3.4    | -2     | -1.3     | 0.5          | MSS htmb to MT-H | 0.647    | 0.005    |

**Supplementary Table 22. Distribution of abundance scores by cohort (relevant to Fig.6b, Supplementary Fig. 10cd).** Statistical significance was calculated using Welch's unequal variances t-test and Kolmogorov-Smirnov test.

| MS cohort | sex |     | site  |        | total in cohort | box plot stats |         |        |          |              | comparison       |        |          |
|-----------|-----|-----|-------|--------|-----------------|----------------|---------|--------|----------|--------------|------------------|--------|----------|
|           | F   | M   | colon | rectum |                 | low whisker    | low box | median | high box | high whisker | Comp. groups     | t.test | ks.test  |
| MT-H      | 88  | 64  | 141   | 11     | 152             | -0.1           | 0.3     | 0.3    | 0.7      | 1.2          | MT-H to MT-L     | 0.8    | 0.3      |
| MT-L      | 325 | 300 | 549   | 76     | 625             | -0.1           | 0.2     | 0.3    | 0.8      | 1.3          | MT-L to MSS htmb | 0.5    | 2.84E-04 |
| MSS htmb  | 30  | 106 | 117   | 19     | 136             | -0.1           | 0.2     | 0.3    | 0.7      | 1.2          | MSS htmb to MT-H | 0.4    | 5.57E-05 |

**Supplementary Table 23. Distribution of LPA and abundance scores based on hotspot status (relevant to Fig.6gh).** Statistical significance was calculated using Welch's unequal variances t-test and Kolmogorov-Smirnov test.

| boxplot stats        | LPA non-hotspot | LPA hotspot | abundance non-hotspot | abundance hotspot |
|----------------------|-----------------|-------------|-----------------------|-------------------|
| sample size          | 346             | 582         | 181                   | 260               |
| low whisker          | -5.685          | -5.41       | -0.124                | -0.081            |
| low box              | -3.488          | -3.579      | 0.21                  | 0.255             |
| median               | -2.2255         | -2.472      | 0.481                 | 0.29              |
| high box             | -0.718          | -1.484      | 0.8355                | 0.64              |
| high whisker         | 1.727           | 1.295       | 1.312                 | 1.205             |
| Comparison (p-value) |                 |             |                       |                   |
| ks.test              | 6.84E-07        |             | 0.0001618             |                   |
| t.test               | 0.003083        |             | 0.04735               |                   |

**Supplementary Table 24. Comparison of copy number alteration profiles, by MS cohorts, subsite, and sex (p-values); relevant to Fig.7a and Supplementary Fig. 12.** Statistical significance was calculated using two-sided Fisher exact test.

| <b>MS cohorts</b> |         |
|-------------------|---------|
| Group             | p_value |
| MT-L vs MT-H      | 0.0002  |
| MSS_htmb vs MT-H  | 0.0792  |
| MSS_htmb vs MT-L  | 0.0002  |

| <b>Sex (M vs F )</b> |         |
|----------------------|---------|
| Group                | p_value |
| MT-L                 | 0.7942  |
| MT-H                 | 0.0148  |
| MSS_htmb             | 0.3919  |

| <b>Site (colon vs rectum)</b> |         |
|-------------------------------|---------|
| Group                         | p_value |
| MT-L                          | 0.1338  |
| MT-H                          | 0.1644  |
| MSS_htmb                      | 0.0002  |

**Supplementary Table 25. Co-occurrence between PTEN mutations, by cohort** Expected co-occurrence and the p-values for the actual co-occurrence were calculated using binominal distribution model

| mut #     | <b>MT-L</b>         |          |                    |          | <b>MT-H</b>         |          |                    |          | <b>MT-L htmb</b>    |          |                    |          |
|-----------|---------------------|----------|--------------------|----------|---------------------|----------|--------------------|----------|---------------------|----------|--------------------|----------|
|           | all point mutations |          | LOF mutations only |          | all point mutations |          | LOF mutations only |          | all point mutations |          | LOF mutations only |          |
|           | log2 (ratio)        | p-value  | log2 (ratio)       | p-value  | log2 (ratio)        | p-value  | log2 (ratio)       | p-value  | log2 (ratio)        | p-value  | log2 (ratio)       | p-value  |
| 0         | 0.00328             | 0.955    | 0.00335            | 0.968    | 0.131               | 0.213    | 0.141              | 0.182    | 0.422               | 0.072    | 0.476              | 0.0452   |
| 1         | -0.143              | 0.063    | -0.172             | 0.038    | -0.956              | 5.98E-10 | -1.16              | 2.87E-14 | -1.23               | 6.77E-05 | -1.86              | 7.07E-07 |
| 2 or more | 1.56                | 2.60E-08 | 1.9                | 3.63E-10 | 1.07                | 7.86E-08 | 1.22               | 2.40E-09 | 0.366               | 0.253    | 0.521              | 0.107    |

**Supplementary Table 26. TMB distribution, by MS cohorts and PTEN mutation multiplicity.** Related to Supplementary Figure 13.

| box plot stats | MT-H mult | MT-H single | MT-L mult | MT-L single | MSS htmb mult | MSS htmb single |
|----------------|-----------|-------------|-----------|-------------|---------------|-----------------|
| low whisker    | 11.3      | 15          | 0         | 0           | 17.5          | 16.3            |
| low box        | 34.8      | 33.8        | 2.6       | 2.5         | 117.9         | 45.1            |
| median         | 49.6      | 46.3        | 4.8       | 3.8         | 195           | 148.8           |
| high box       | 63.8      | 63.9        | 7         | 6.1         | 275.7         | 256             |
| high whisker   | 106.3     | 105.3       | 13.2      | 11.3        | 474.1         | 553.3           |

**Supplementary Table 27. Co-occurrence or mutual exclusion between alterations in PTEN and genes shown, in the complete cohort (for any alteration).** Statistical significance was calculated using two-sided Fisher exact test.

| Second gene (gene B)  | APC     | KRAS     | SMAD4    | TP53     | PIK3CA   |
|-----------------------|---------|----------|----------|----------|----------|
| Neither               | 6551    | 15464    | 24809    | 6844     | 25267    |
| PTEN not B            | 668     | 1286     | 2208     | 1102     | 2197     |
| B not PTEN            | 24612   | 15699    | 6354     | 24319    | 5896     |
| Both                  | 2298    | 1680     | 758      | 1864     | 769      |
| log2 (odds ratio)     | -0.1271 | 0.3638   | 0.42264  | -1.0709  | 0.58495  |
| p-value               | 0.05671 | 6.97E-11 | 9.96E-11 | 5.96E-71 | 5.73E-19 |
| 95% conf, upper limit | 0.00546 | 0.47459  | 0.54895  | -0.9552  | 0.71118  |
| 95% conf, lower limit | -0.2583 | 0.25328  | 0.29522  | -1.186   | 0.45769  |

**Supplementary Table 28. Co-occurrence or mutual exclusion between alterations in PTEN and genes shown (relevant to Fig.8ad).** Statistical significance was calculated using two-sided Fisher exact test.

| Gene_A        | Gene_B | MS cohort | log2_odds | p_val      | 95% conf., upper | 95% conf., bottom |
|---------------|--------|-----------|-----------|------------|------------------|-------------------|
| PTEN_lof      | APC    | MT-L      | -0.08     | 0.64728867 | 0.26             | -0.40             |
| PTEN_lof      | KRAS   | MT-L      | 0.86      | 2.30E-10   | 1.14             | 0.59              |
| PTEN_lof      | SMAD4  | MT-L      | 0.45      | 0.00297895 | 0.75             | 0.15              |
| PTEN_lof      | TP53   | MT-L      | -1.38     | 8.82E-23   | -1.11            | -1.65             |
| PTEN_lof      | APC    | MT-H      | -0.20     | 0.45950189 | 0.35             | -0.75             |
| PTEN_lof      | KRAS   | MT-H      | -0.38     | 0.23290731 | 0.23             | -1.01             |
| PTEN_lof      | SMAD4  | MT-H      | 0.20      | 0.59479284 | 0.94             | -0.60             |
| PTEN_lof      | TP53   | MT-H      | -0.11     | 0.77358084 | 0.46             | -0.69             |
| PTEN_lof      | APC    | MSS htmb  | 4.07      | 7.11E-05   | 9.44             | 1.43              |
| PTEN_lof      | KRAS   | MSS htmb  | 0.37      | 0.3956815  | 1.24             | -0.50             |
| PTEN_lof      | SMAD4  | MSS htmb  | 0.84      | 0.05278208 | 1.73             | -0.04             |
| PTEN_lof      | TP53   | MSS htmb  | -0.01     | 1          | 0.89             | -0.89             |
| PTEN_deletion | APC    | MT-L      | -0.16     | 0.14652764 | 0.06             | -0.38             |
| PTEN_deletion | KRAS   | MT-L      | 0.29      | 0.00172171 | 0.47             | 0.11              |
| PTEN_deletion | SMAD4  | MT-L      | 0.56      | 6.98E-08   | 0.76             | 0.36              |
| PTEN_deletion | TP53   | MT-L      | -0.34     | 0.00112935 | -0.13            | -0.55             |
| PTEN_presence | PIK3CA | all comb. | 0.58      | 5.73E-19   | 0.71             | 0.46              |
| PTEN_presence | PIK3CA | MT-L      | 0.24      | 1.50E-03   | 0.39             | 0.09              |
| PTEN_point    | PIK3CA | MT-L      | 0.68      | 1.11E-06   | 0.94             | 0.40              |
| PTEN_lof      | PIK3CA | MT-L      | 0.69      | 1.06E-05   | 0.98             | 0.38              |
| PTEN_deletion | PIK3CA | MT-L      | -0.49     | 1.08E-04   | -0.24            | -0.76             |
| PTEN_lof      | PIK3CA | MT-H      | -0.08     | 7.79E-01   | 0.47             | -0.65             |
| PTEN_lof      | PIK3CA | MSS htmb  | 2.03      | 3.00E-05   | 3.21             | 0.97              |

### Supplementary references

1. Chang MT, *et al.* Accelerating Discovery of Functional Mutant Alleles in Cancer. *Cancer Discov* **8**, 174-183 (2018).
2. Chao JT, *et al.* A Premalignant Cell-Based Model for Functionalization and Classification of *PTEN* Variants. *Cancer Res* **80**, 2775-2789 (2020).
3. Hu Q, *et al.* LncRNAs-directed *PTEN* enzymatic switch governs epithelial-mesenchymal transition. *Cell Res* **29**, 286-304 (2019).
4. Gong L, *et al.* Nuclear *PTEN* tumor-suppressor functions through maintaining heterochromatin structure. *Cell Cycle* **14**, 2323-2332 (2015).
5. Post KL, *et al.* Multi-model functionalization of disease-associated *PTEN* missense mutations identifies multiple molecular mechanisms underlying protein dysfunction. *Nat Commun* **11**, 2073 (2020).

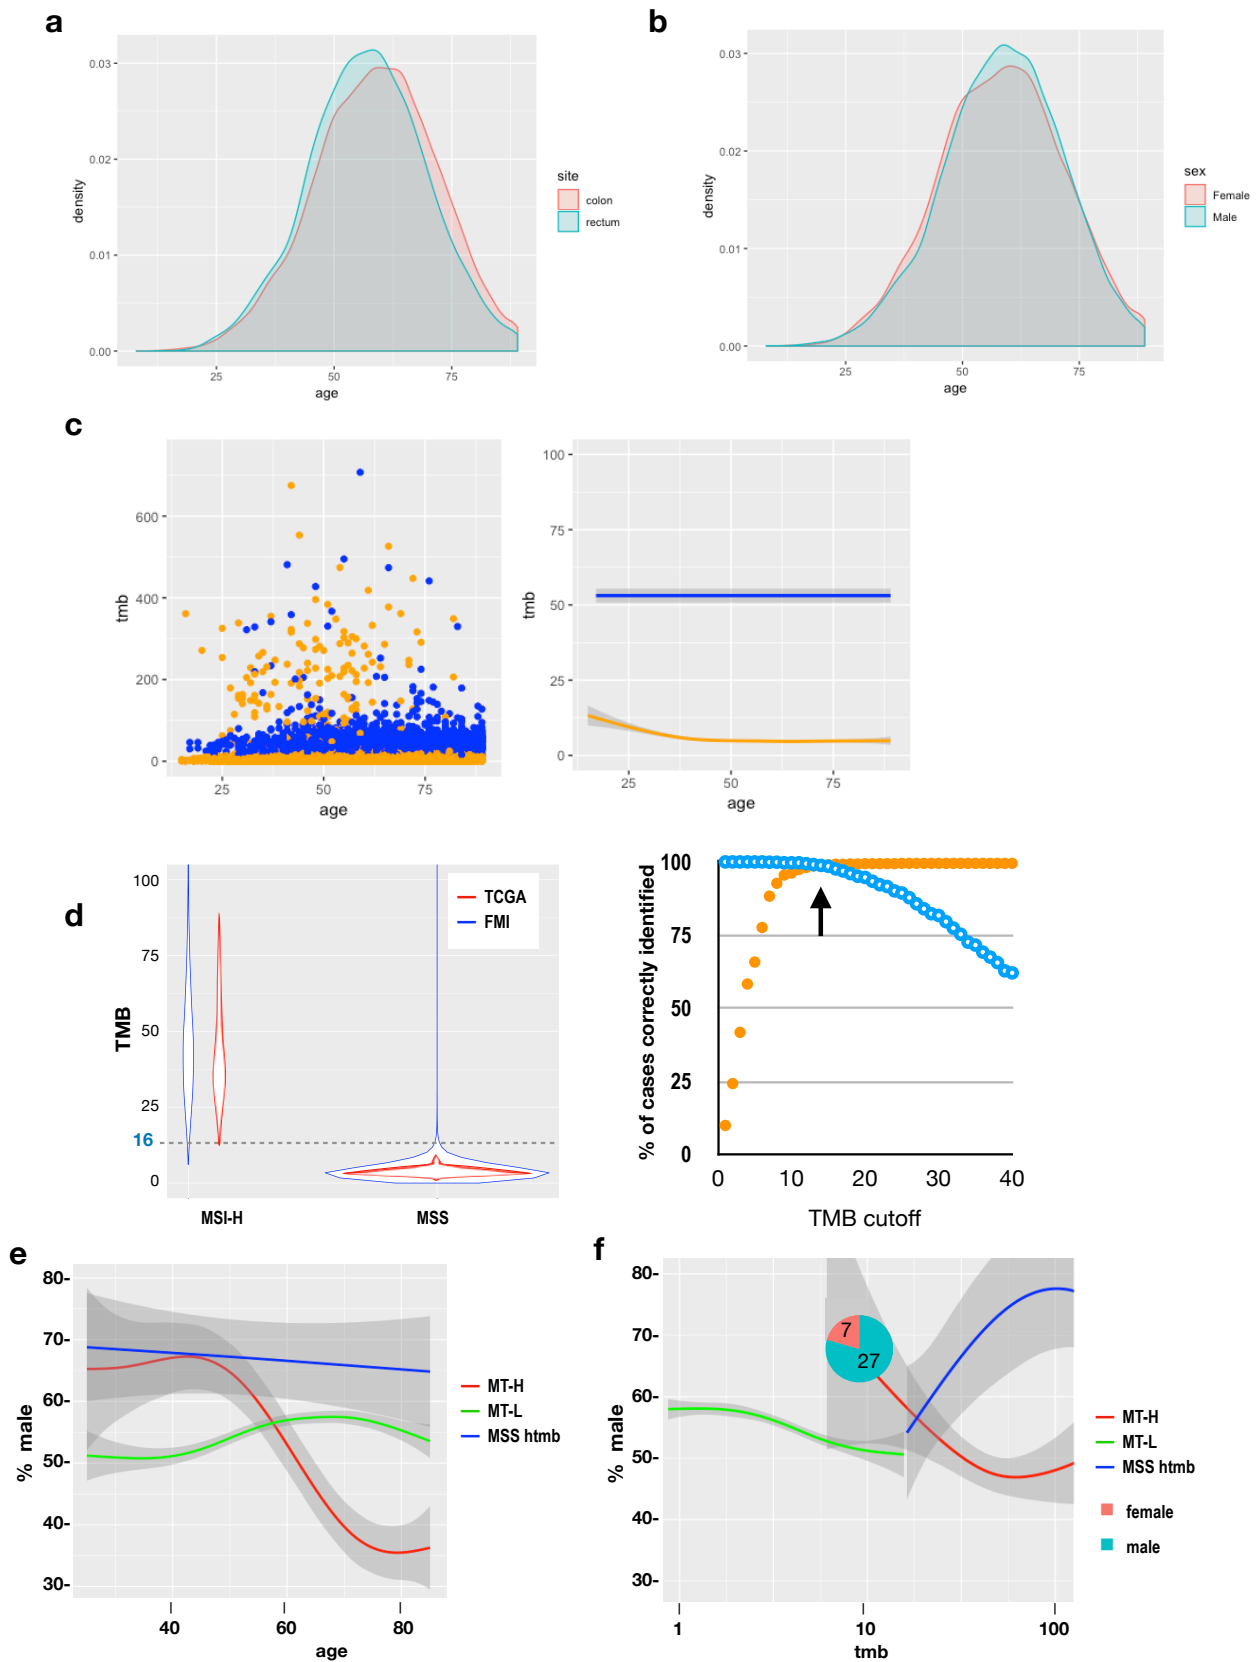

Serebriiskii et.al.

**Supplementary Fig. 1. Additional characteristics of cohort, including analysis of relationship between TMB, age, sex, and tumor subsite (related to Fig.1; Source Data are provided as a Source Data file). a, b.** Age distribution for patients with sequenced tumors arising in the colon versus rectum (a), or in males versus females (b). **c.** Distribution of TMB in relation to age in MSI-H and MSS tumors. Left, individual tumors; right, trend lines; gray shading indicates 95% confidence limit. Orange, MSS; blue, MSI-H. **d.** Establishing TMB cutoff score for assignment of likely MS status. Left, distribution of TMB in MSI-H and MSS tumors, for FMI (blue) and TCGA CRC (red) cohorts. Right, percentage of MSS (orange) versus MSI-H (blue) tumors correctly identified by a TMB cutoff. **e, f.** Gender ratio, plotted as % of males, in MT-L vs MT-H vs MSS-htmb tumors, based on age (e) or TMB (f). Inset, gender ratio in the MT-H subset with the TMB < 16. Gray shading indicates 95% confidence interval.



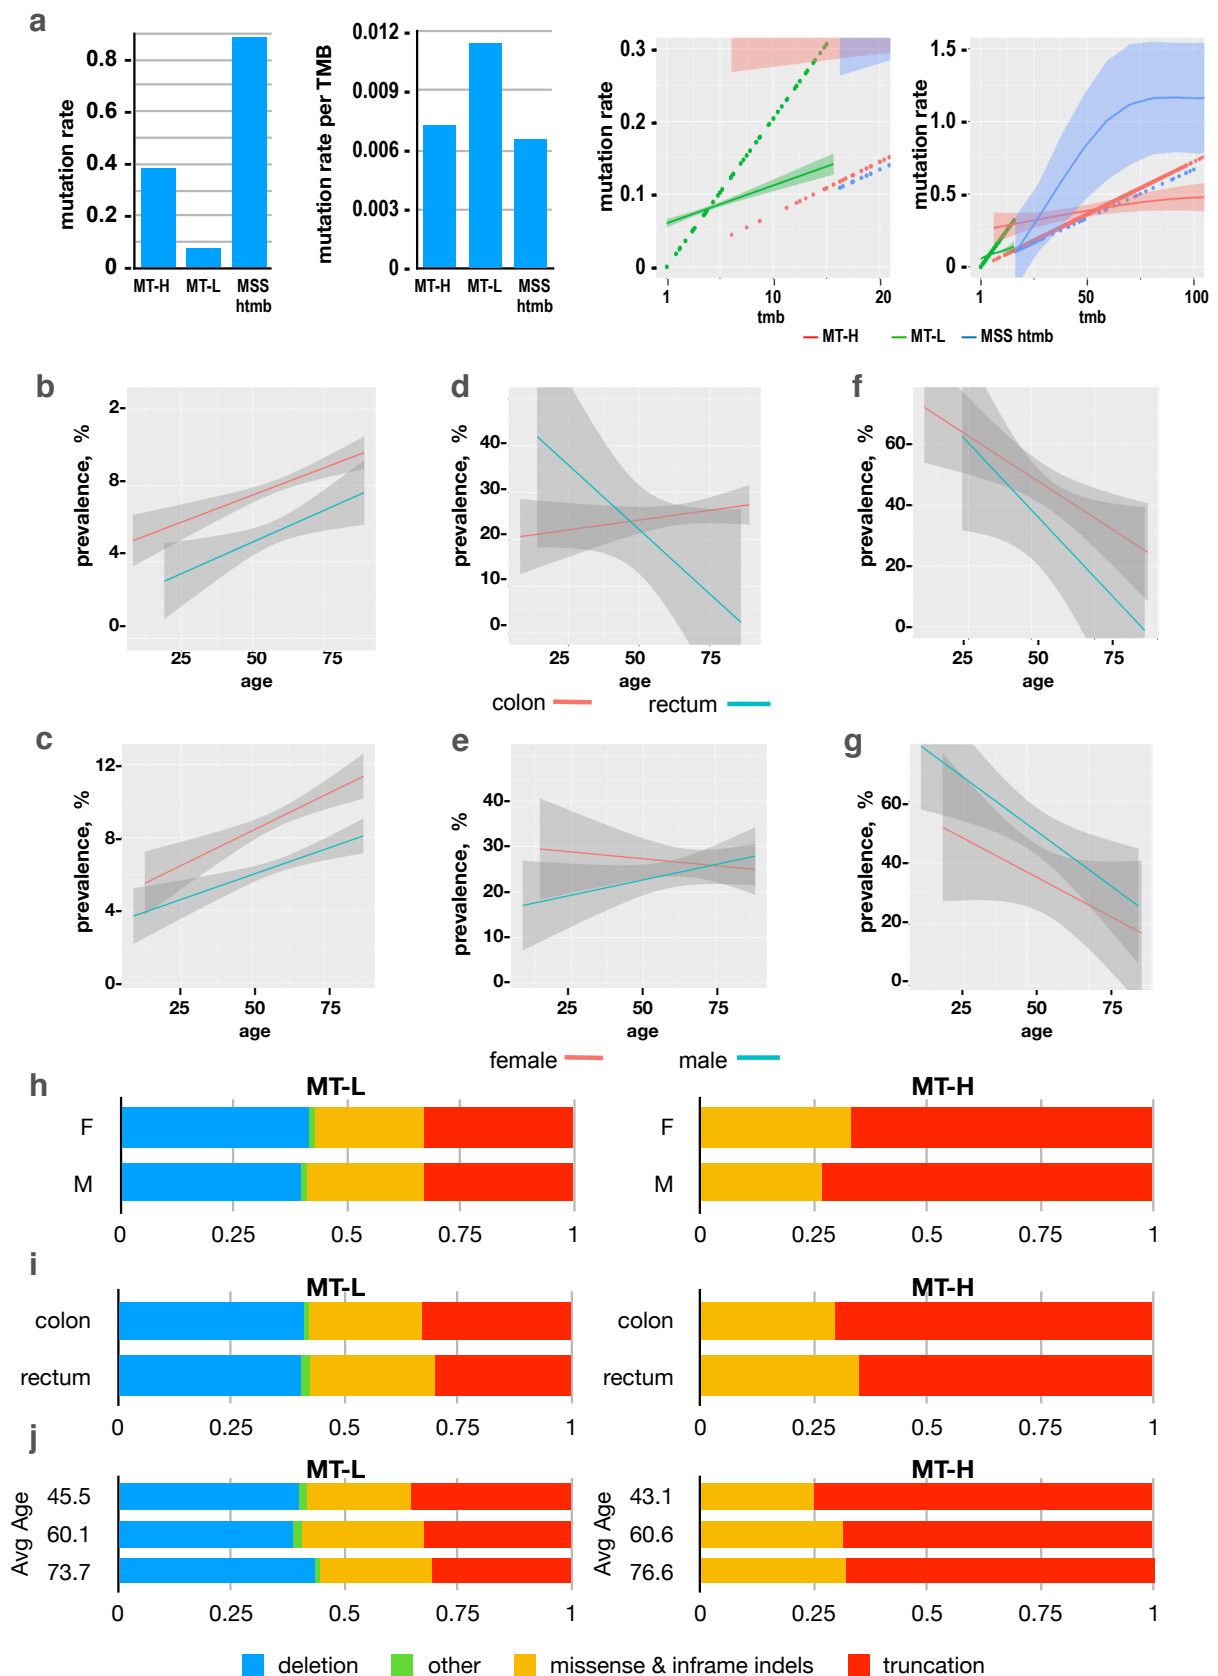

Serebriiskii et.al.

**Supplementary Fig. 2. Patterns of *PTEN* mutation based on age, sex, and tumor subsite, in MT-L, MT-H, and MSS-htmb tumors (related to Fig.2; Source Data are provided as a Source Data file).** **a.** Frequency of alteration of *PTEN* in MT-L, MT-H, or MSS-htmb subsets (left), and normalized to TMB (second panel from left). Right two panels: actual (solid line) number of *PTEN* mutations observed at distinct levels of TMB, versus number predicted if mutations occur exactly proportional to TMB (dotted line); tumors with low TMB are shown in panel second from right, and with high TMB at far right. Shading indicates confidence level of 95%. **b-g.** Percent tumors with at least one *PTEN* alteration based on tumor subsite (**b, d, f**) or sex (**c, e, g**) as a factor of age in MT-L (**b, c**), MT-H (**d, e**), or MSS-htmb (**f, g**) CRC. Shaded areas represent 95% confidence intervals. Sample sizes, logistic regression coefficients and exact p-values are provided in Supplementary Tables 8 and 9. **h-j.** Percentage of *PTEN* alterations falling into the indicated classes based on sex (**h**), tumor subsite (**i**), or age (**j**) in MT-L or MT-H CRC. Blue, deep deletion; red, truncation (frameshift, nonsense); yellow, missense or small indel; green, other.

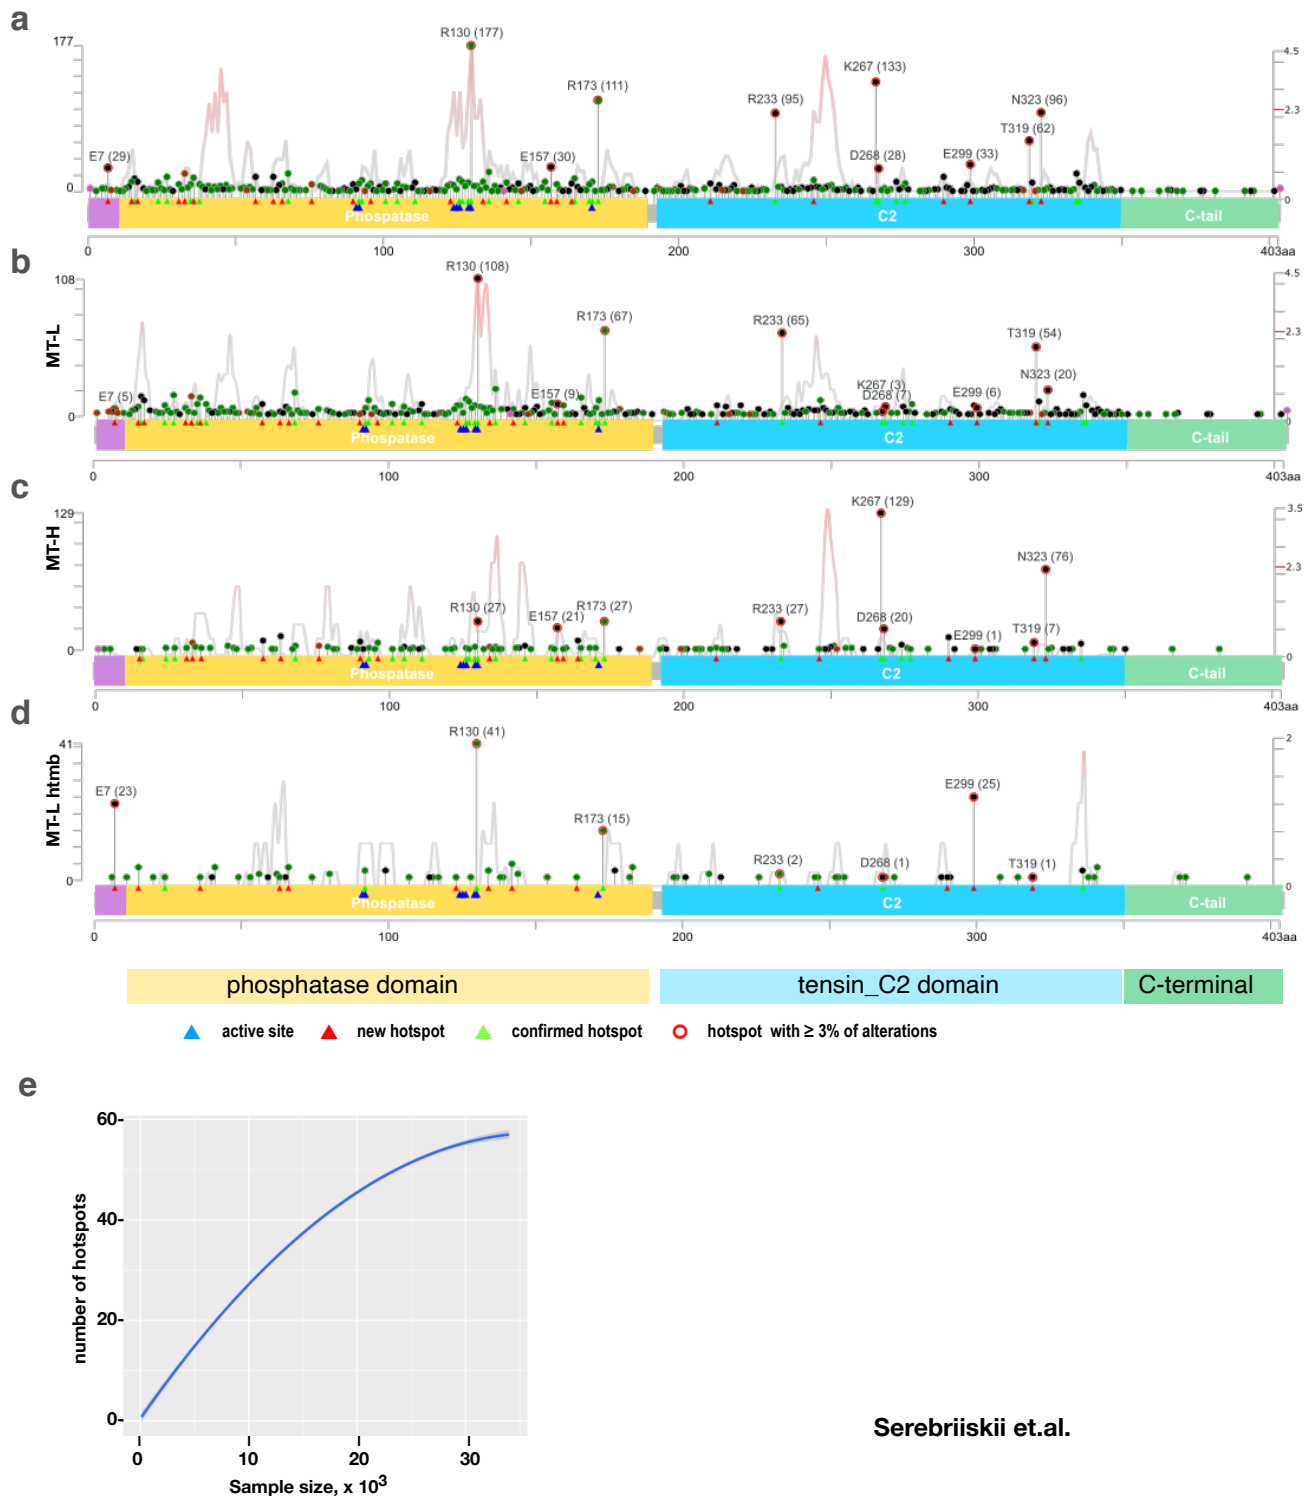

**Supplementary Fig. 3. *PTEN* mutations identified in CRC cohort (related to Fig.3).** Location of all mutations of all classes, including truncating mutations, identified in the complete cohort (**a**), or the MT-L (**b**), MT-H (**c**), or MSS-htmb (**d**) subsets. The height of each lollipop indicates the count of the corresponding mutation in the dataset (left Y-axis). Red triangles underneath the lollipops: novel hotspots identified in this work; green triangles, previously hotspots present in the dataset; red circles on lollipops, hotspots representing >3% of total mutations observed in at least one subset. Density distribution (light gray line) represents the probability of concentration of non-hotspot mutations along the primary structure of *PTEN*, and is plotted as  $-\log_{10}(p)$  on the right Y-axis, with the values above the indicated 2.3 threshold corresponding to p-values <0.005. Mutation counts for each codon and p-values for sliding window analysis are provided as a Source Data file. **e.** Hotspots potentially identifiable in *PTEN* based on analysis of number of sequenced CRC tumors, as described in 1; the current analysis has identified 54 hotspots. Shaded areas represent 95% confidence intervals. Hotspot mutations and mutation-enriched stretches along the primary protein sequence were identified using a binominal distribution model with a p-value cutoff 0.005, uncorrected for multiple comparisons. Source Data are provided as a Source Data file.

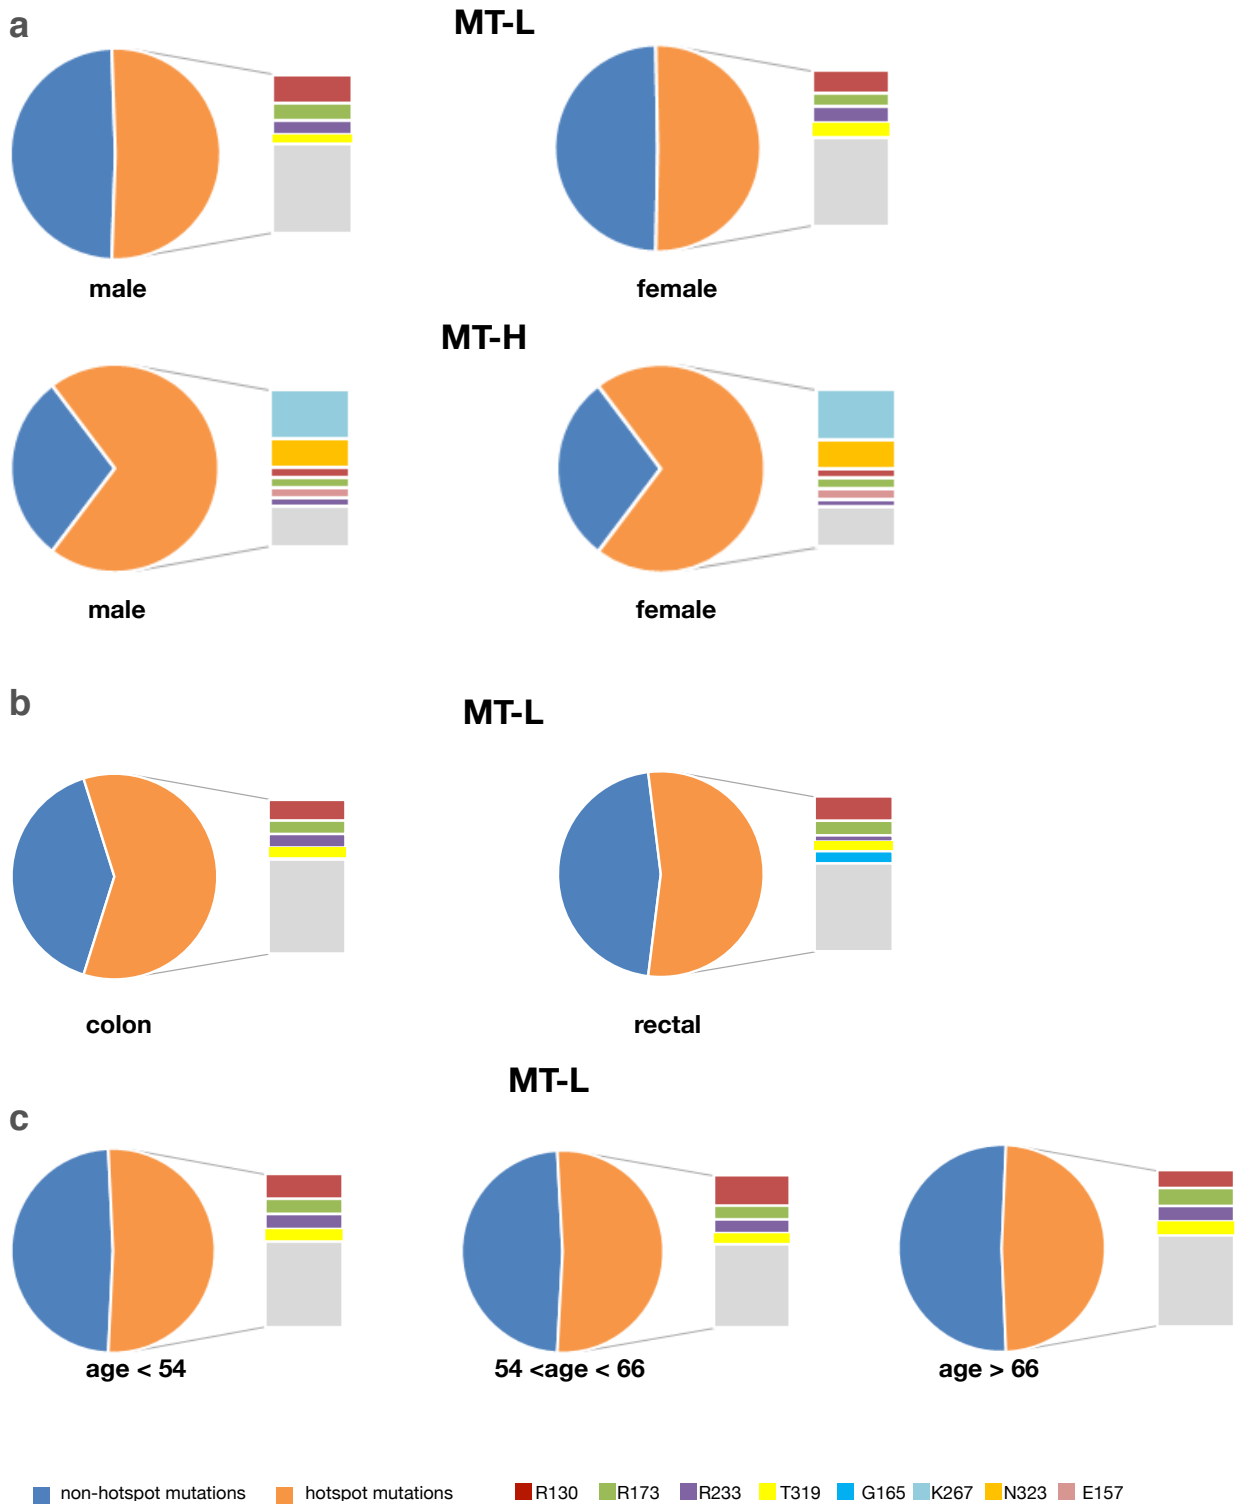

Serebriiskii et.al.

**Supplementary Fig. 4. *PTEN* hotspot mutation analyzed based on sex, tumor subsite, or age (related to Fig.3).** a-c. Pattern of codon location of hotspot mutations in MT-L or MT-H tumors as indicated, analyzed by sex (a), or age as subdivided into groups with equal sample size (b), or tumor subsite (c). No difference in patterns was identified, using chi-squared contingency table test. Insufficient cohort size limited this detailed analysis of hotspot mutations in the MSS-htmb and (in some cases) MT-H cohorts.

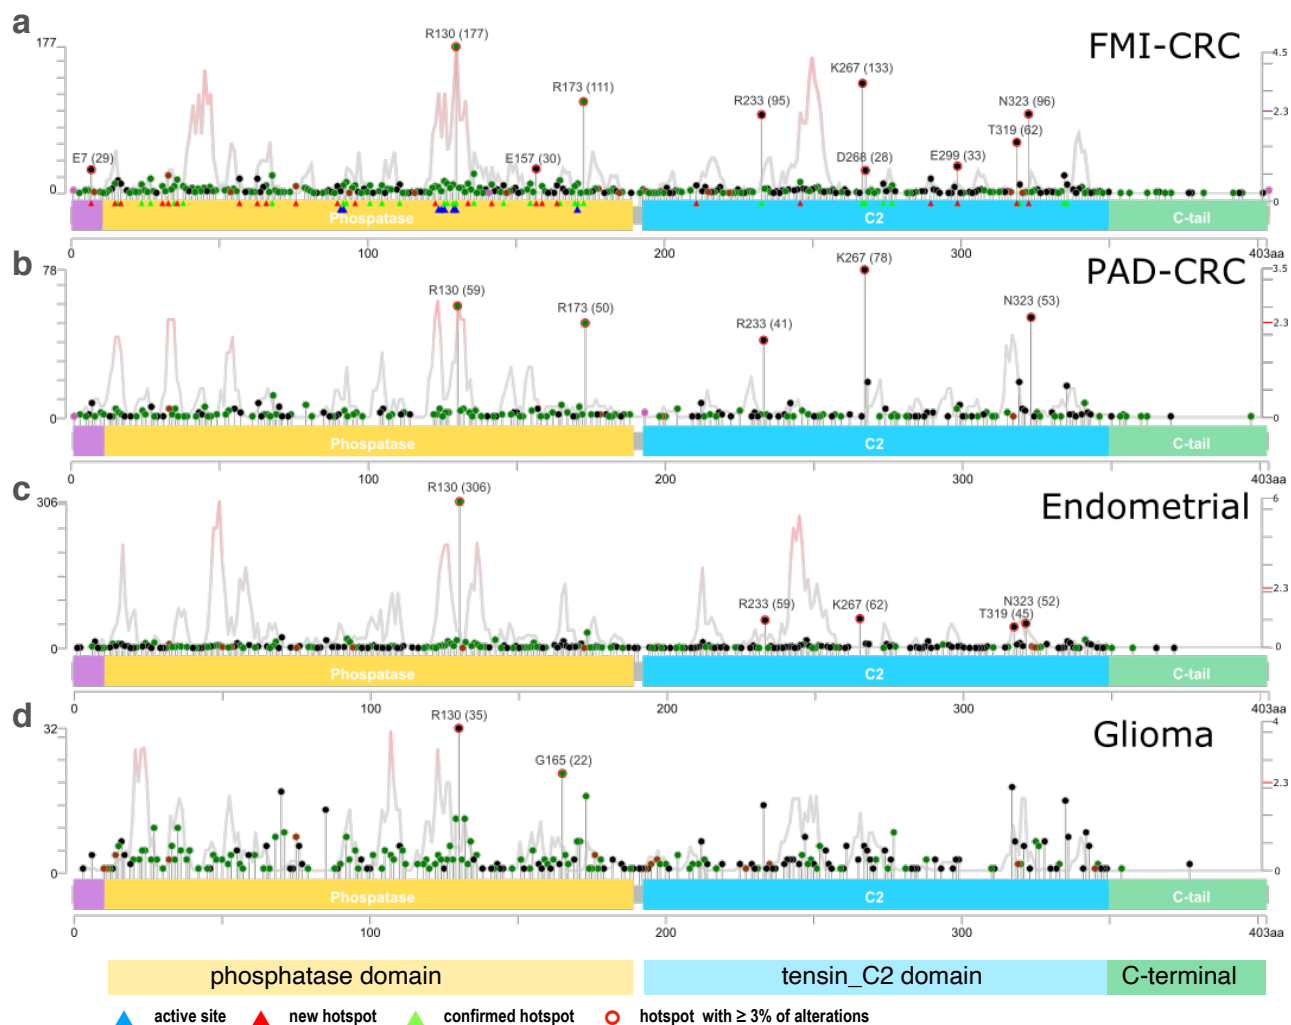

Serebriiskii et.al.

**Supplementary Fig. 5. Comparison of *PTEN* mutations observed in FMI CRC cohort versus publicly available data for CRC and other tumor types (related to Fig.3).** Location of mutations in *PTEN* protein identified in this study (a) contrasted to patterns identifiable from CRC in publicly available data (PAD-CRC) (b), or to two cancer types with high frequency of *PTEN* mutation, endometrial and glioma, based on data in AACR GENIE (c, d). The height of each lollipop indicates the count of the corresponding mutation in the dataset (left Y-axis). Red circles on lillipops, hotspots representing  $>3\%$  of total mutations observed in at least one subset. Density distribution (light gray line) represents the probability of statistically significant concentration of non-hotspot mutations along the primary structure of *PTEN*, and is plotted as  $-\log_{10}(p)$  on the right Y-axis, with the values above the indicated 2.3 threshold corresponding to p-values below 0.005. Hotspot mutations and mutation-enriched stretches along the primary protein sequence were identified using a binominal distribution model with a p-value cutoff 0.005, uncorrected for multiple comparisons. Mutation counts for each codon and p-values for sliding window analysis are provided as a Source Data file.





### MSS htmb

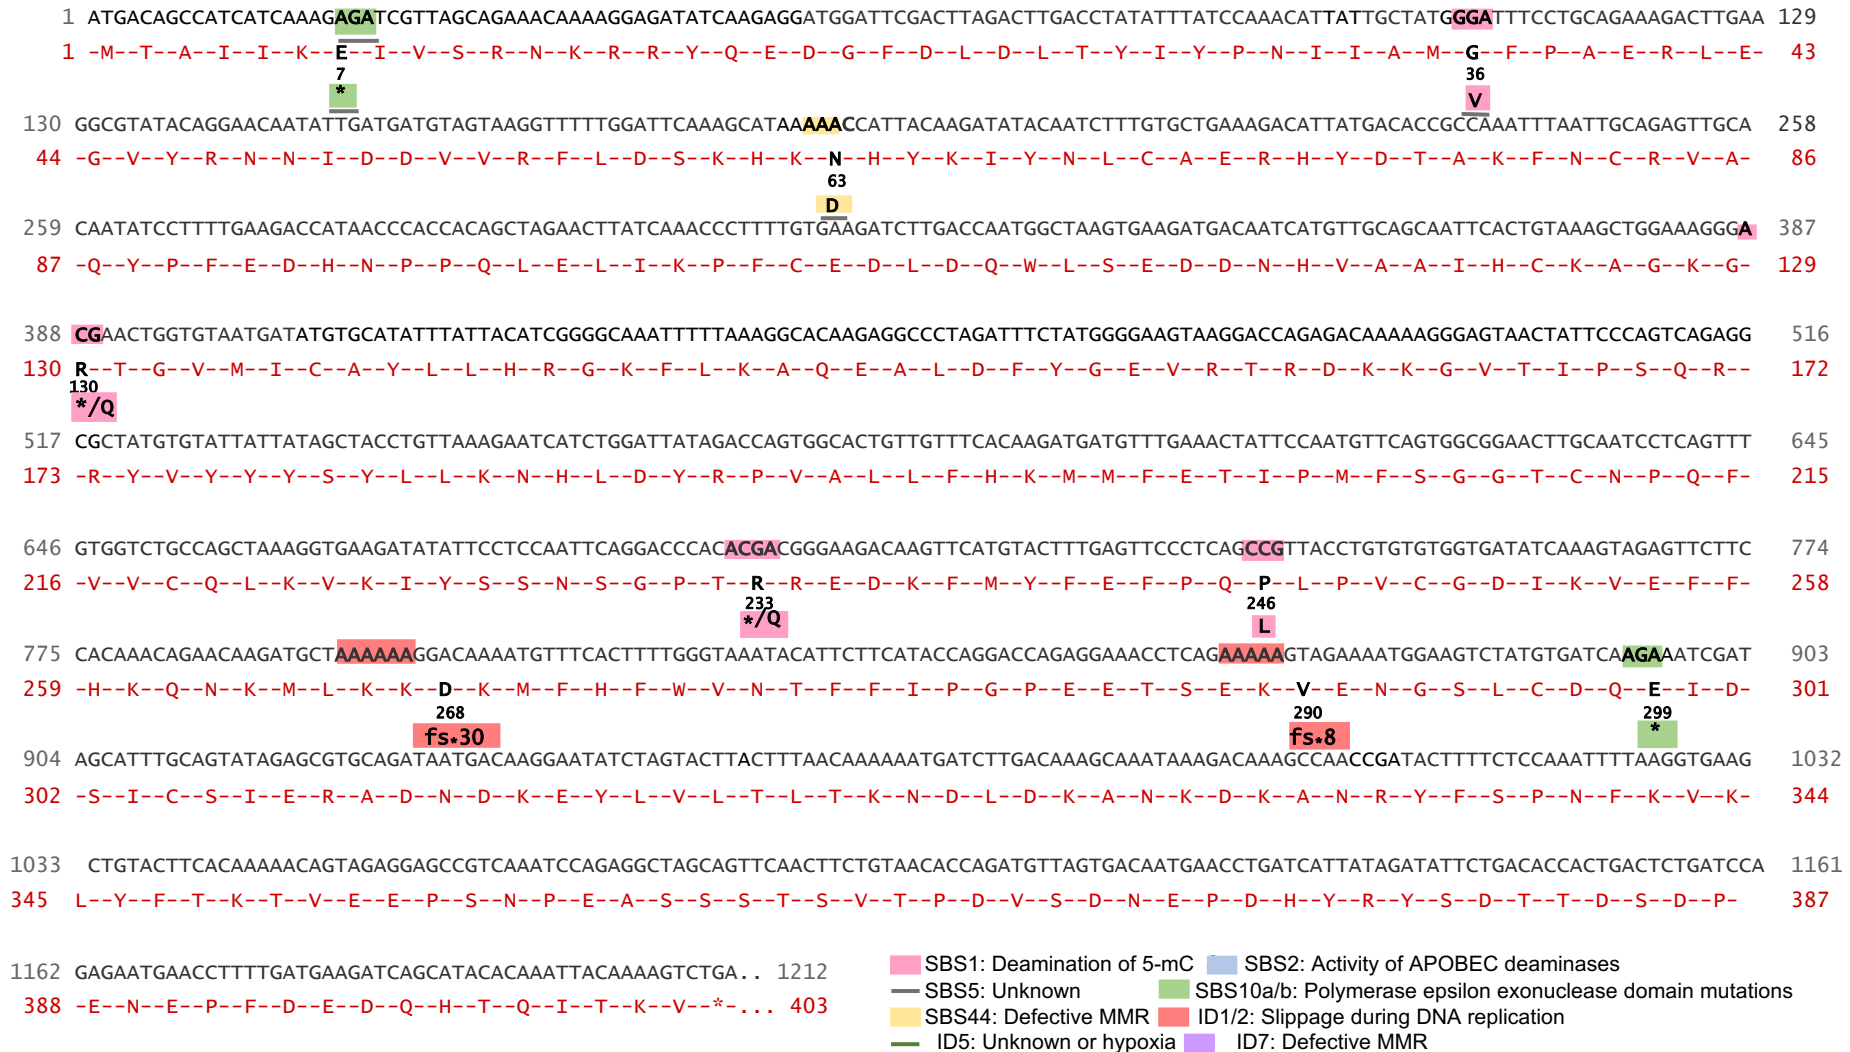

Serebriiskii et al.

**Supplementary Fig. 6c. Mutational signatures associated with *PTEN* hotspots (related to Fig.4).** Nucleotide sequences annotated with mutation signatures for MSS htmb tumor subset. Amino acids shown under lines represent protein changes associated with distinct mutational processes.

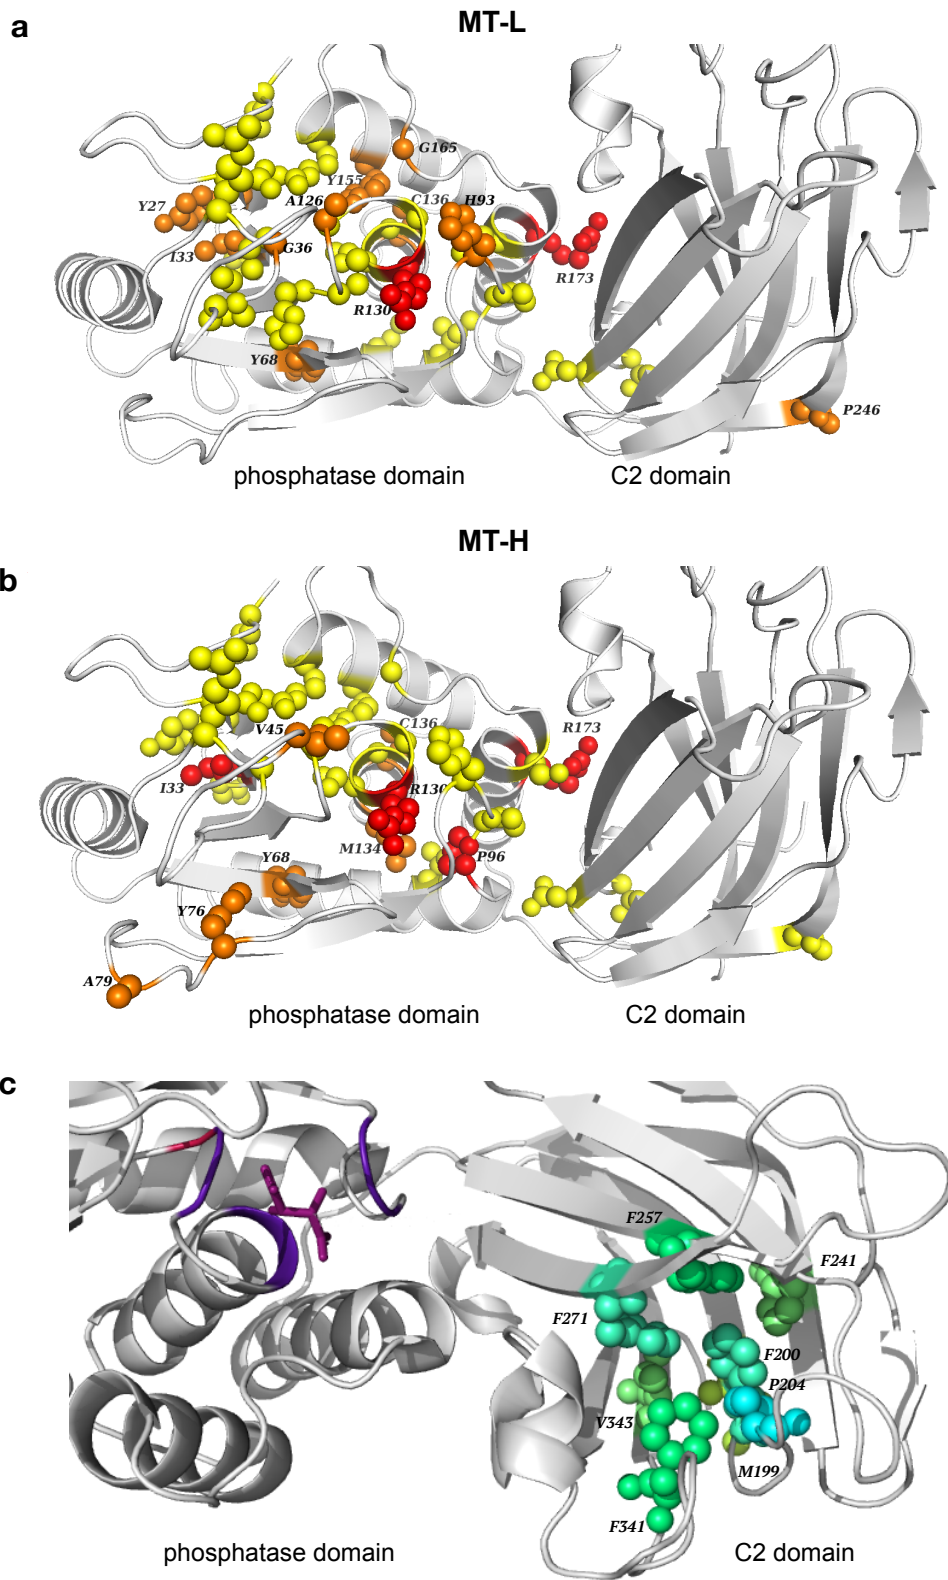

Serebriiskii et.al.

**Supplementary Fig. 7. Location of selected hotspot missense and indel mutations in MT-H versus MT-L tumors, and of a 3D hotspot in the C2 domain on PTEN 3D structure (modeled from pdb:1D5R [<https://www.rcsb.org/structure/1d5r>]; related to Fig.5).** a., b. MT-H (a) and MT-L (b) missense and indel mutations. Heatmap scale for MT-L: Yellow, counts >6 (R15, D24, N31, M35, P38, R47, P95, I101, C105, H123, C124, G127, G129, T131, K128, G132, R159, Q171, D252, T277); Orange, counts > 10 (Y27, I33, G36, Y68, H93, A126, C136, Y155, G165, P246); Red, R130 and R173. Heatmap scale for MT-H: Red, 7 or more (I33, P96, R130, R173); Orange, 3 or 4 (V45, Y68, Y76, A79, M134, C136); Yellow, 1 or 2 (R15, D24, Y27, N31, G36, R47, H93, P95, I101, A126, G127, G129, G132, Y155, R159, G165, S170, P246, D252, T277). c. 3D hotspot identified in C2 domain. Heatmap scale for number of mutations: 5, lime green (F257 and F341); 4, cyan, (P204); 3, limon (M199); 2, lime (V343 and F241); 1, green cyan (F200 and F271) (color names according to PyMol specifications).



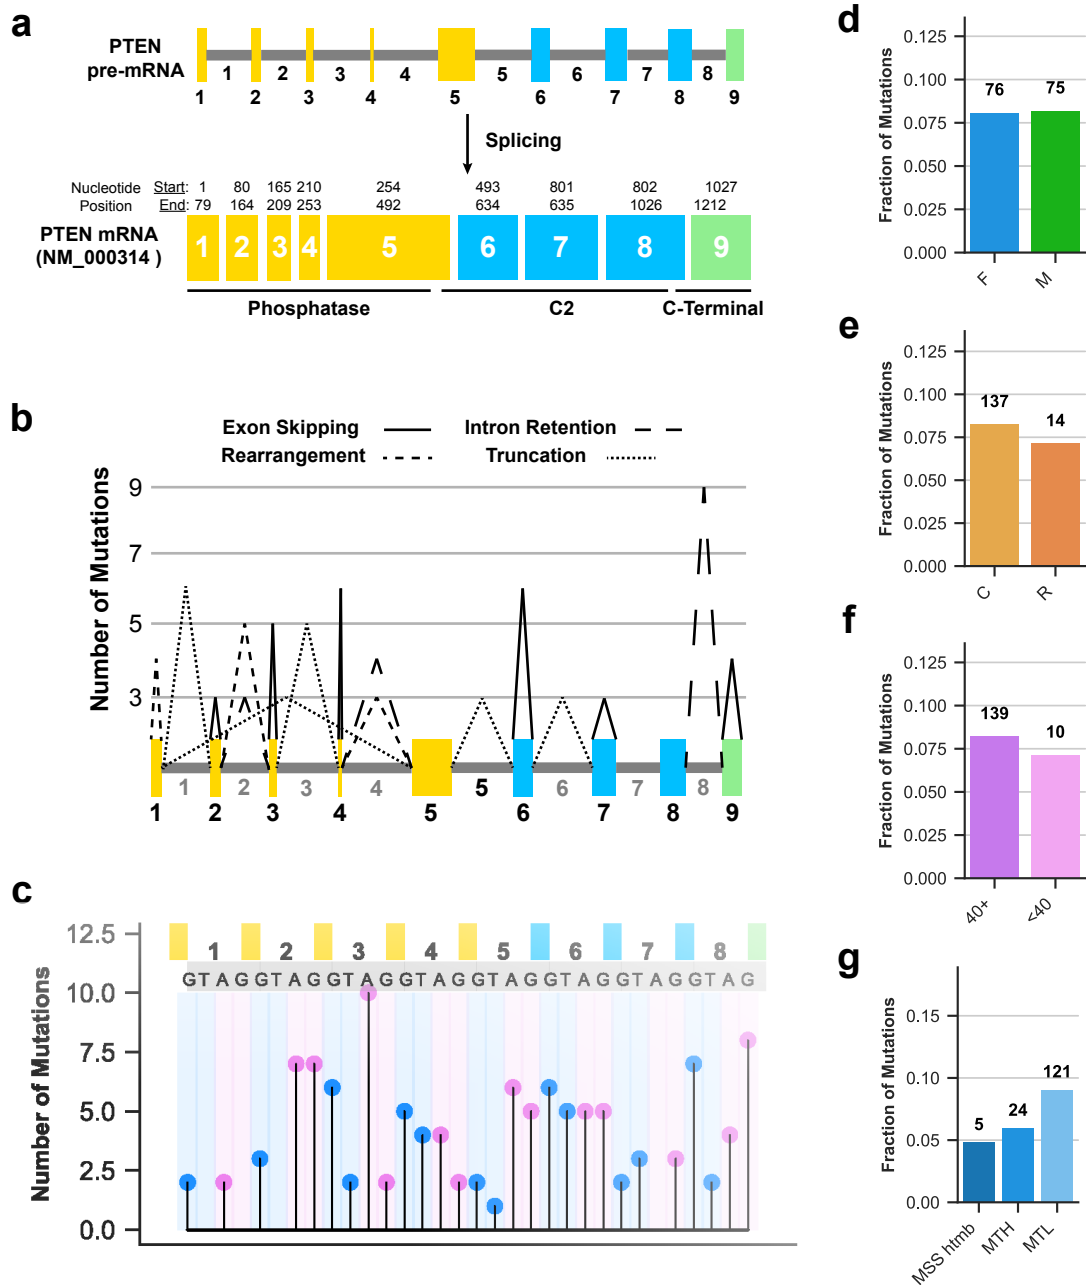

Serebriiskii et al.

**Supplementary Fig. 8. PTEN mutations affecting splicing.** a. Nucleotide positions of introns and exons in PTEN with Human Genome Sequence Variant (HGVS) nomenclature for donor and acceptor splice site mutations (a). Number of mutations by intron (b) and +2, +1, -1, -2 positions (c). Fraction of PTEN splice mutations by sex (d), tumor site (e), age (f), and in the MT-L, MT-H, and MSS-htmb cohorts (g). No statistically significant relationship between mutations and patient characteristics (d-g) was found, as assessed by a two-sided Fisher exact test ( $p > 0.05$ ).

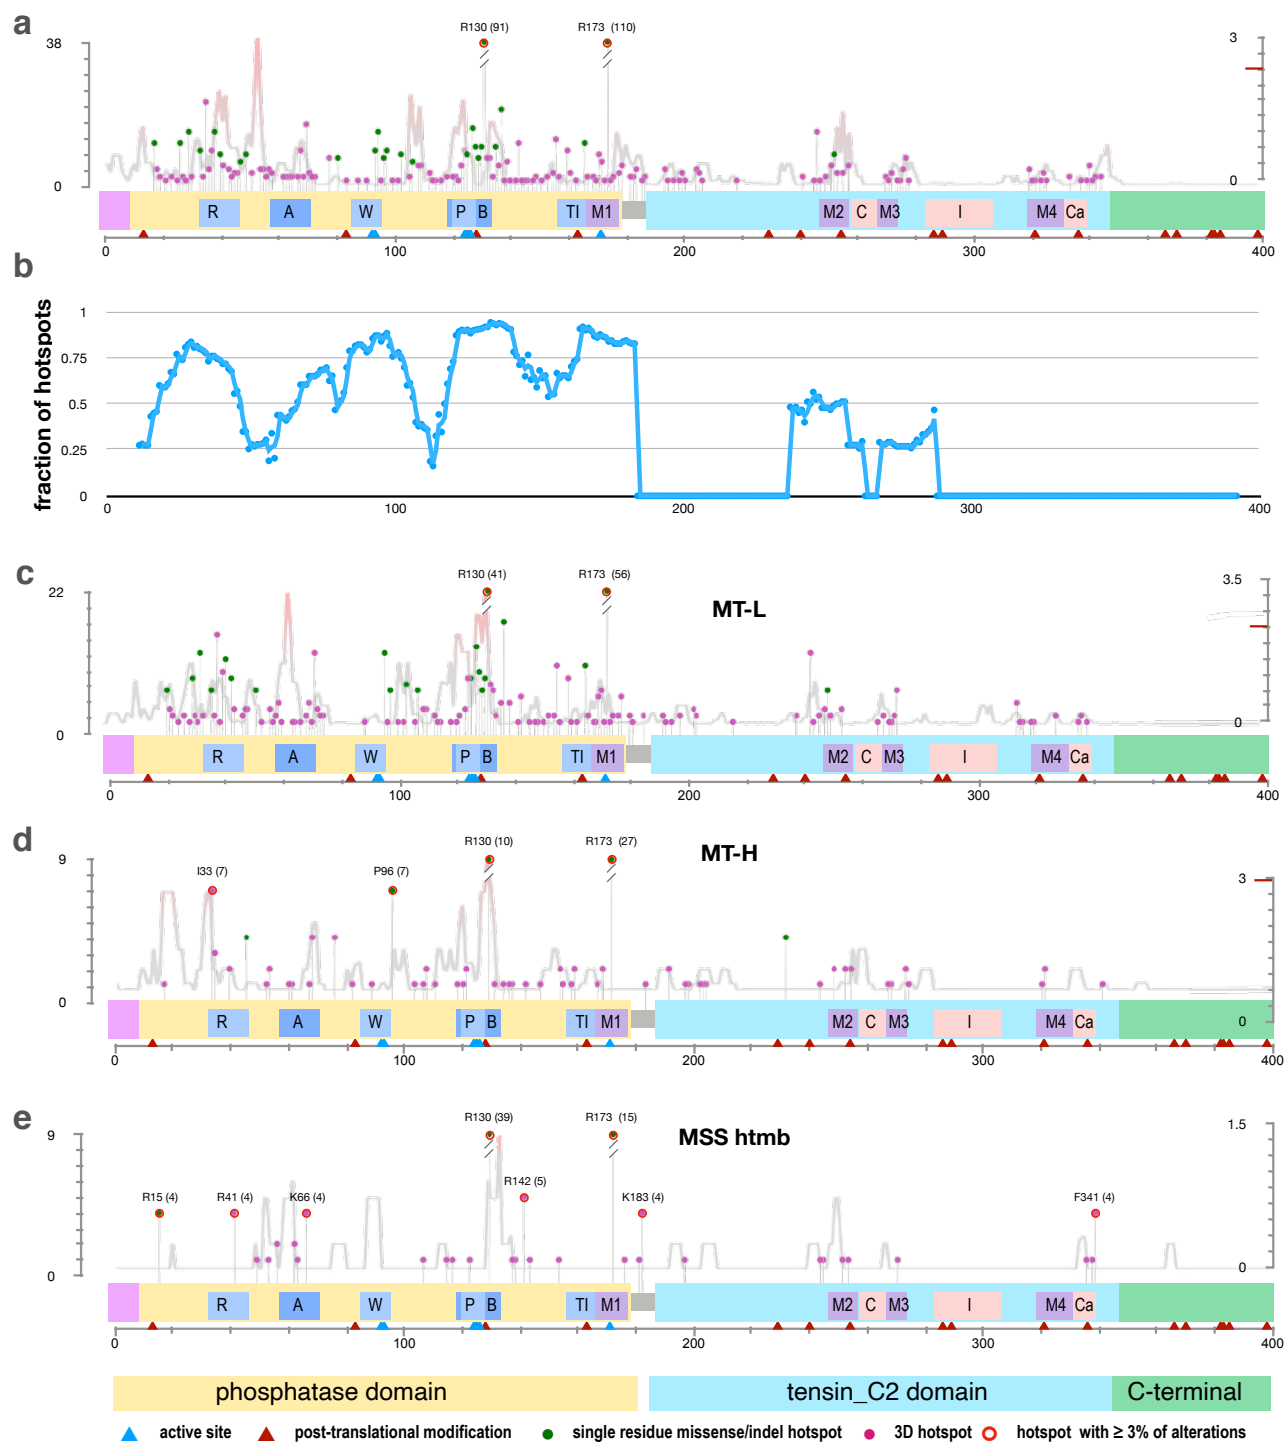

**Supplementary Fig. 9. Missense and small indel mutation hotspots affecting protein sequence in *PTEN* (related to Fig.5).** **a.** Location of missense/small indel hotspot mutations in *PTEN* protein identified in this study (green; >6 mutations observed), and 3D hotspots (magenta) in complete set of CRCs. Hotspots that are members of both groups (>6 mutations but located in a region of elevated 3D mutation) are colored magenta. **b.** Fraction of single-residue hotspot mutations based on sliding window analysis (window size: 20aa). **c-e.** Location of missense and small indel hotspots (green) and 3D hotspots (magenta) in the MT-L (c), MT-H (d), and MSS-hthmb (e) subsets. Description of protein features for **a**, and **c-e**: R, Arginine loop (35-49); A, ATP-binding type-A motif (60-73); W, WPD loop (88-98); P, P loop (123-131); B, ATP-binding type-B motif (122-136); TI, TI loop (160-171); M1, Inter-domain Motif 1 (169-180); M2, Inter-domain Motif 2 (250-259); C, CBR3 loop (260-269); M3, Inter-domain Motif 3 (264-276); I, Internal loop in C2 domain (286-309); M4, Inter-domain Motif 4 (321-334); Ca, Ca2 loop (321-342). Blue triangles, active site (aa 92,93,124-126,129,130,171); brown triangles, most common post-translational modifications. Hotspot mutations and mutation-enriched stretches along the primary protein sequence were identified using a binominal distribution model; significance of the enrichment of mutations in 3D hotspots was calculated in permutation-based test. P-value cutoff 0.005 was used as a threshold for hotspot detection, uncorrected for multiple comparisons. Missense and inframe-indel mutation counts for each codon and p-values for sliding window analysis are provided as a Source Data file.

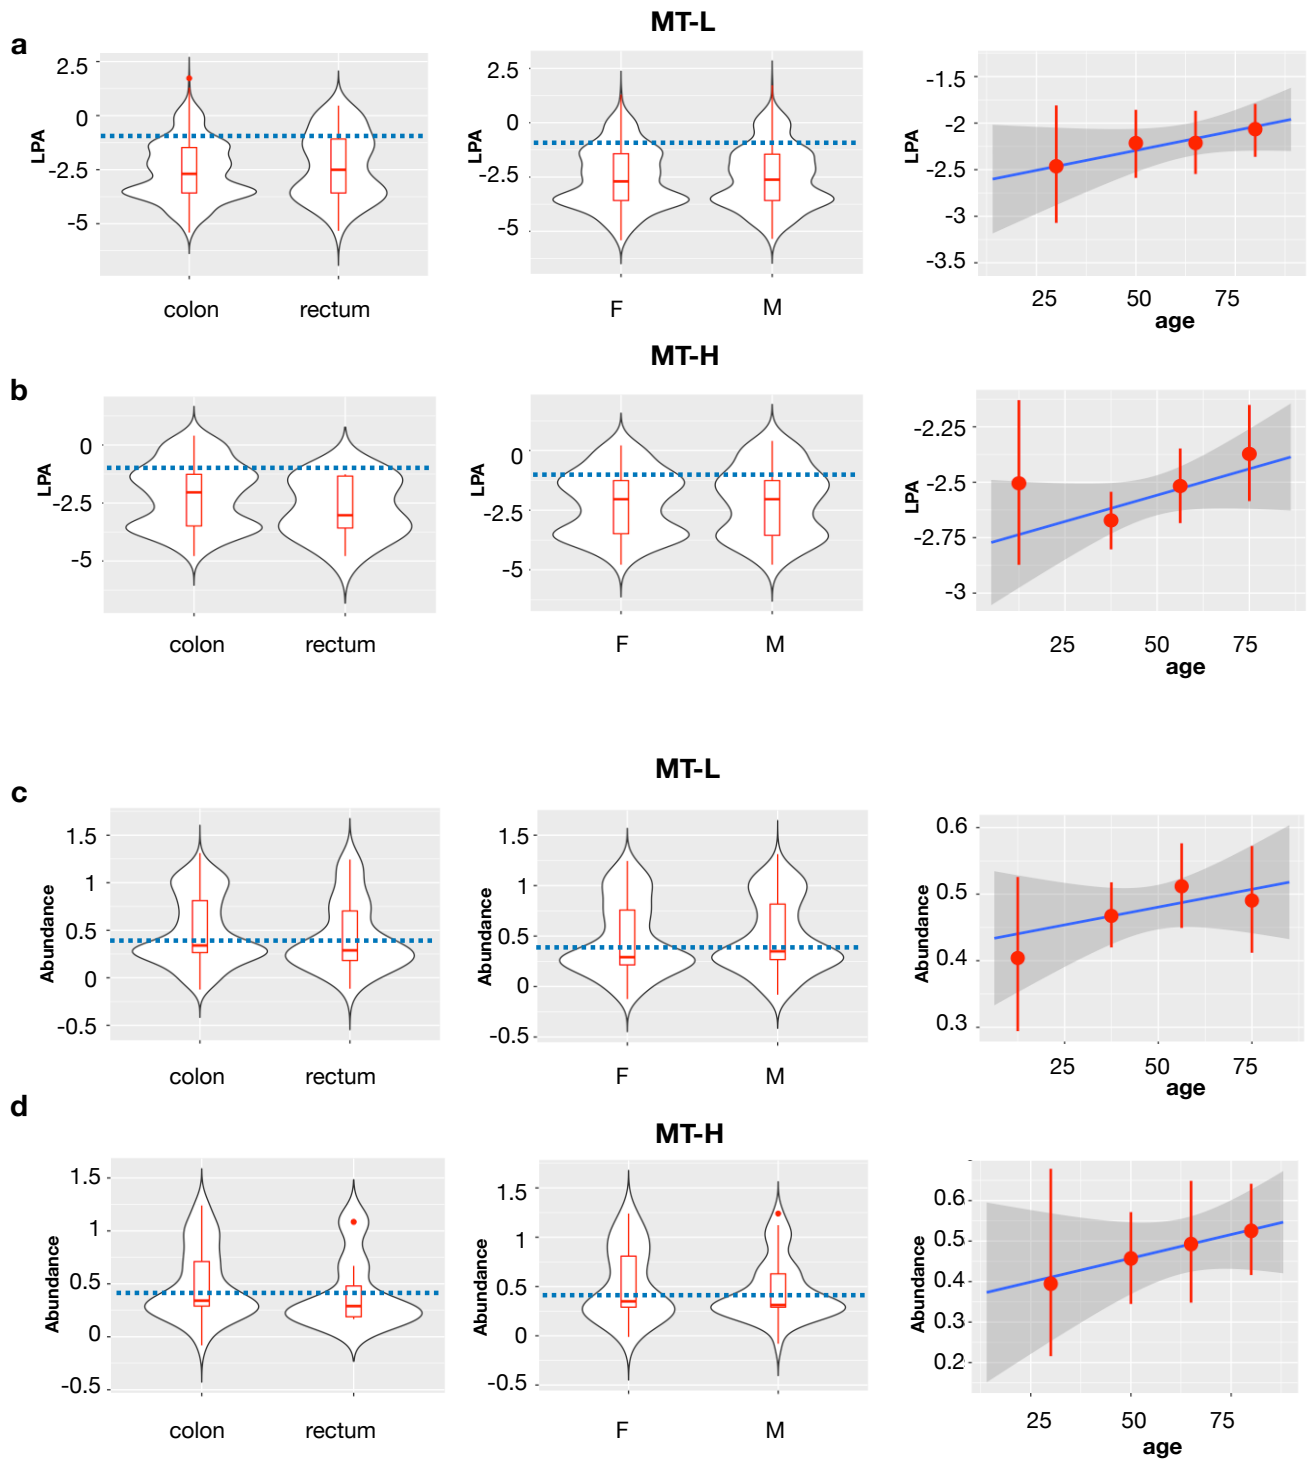

Serebriiskii et.al.

**Supplementary Fig. 10. Lipid phosphatase activity (LPA) and protein abundance of *PTEN* mutations based on tumor subsite, sex, and age, in MT-L and MT-H CRC. a-d.** LPA (a, b) and abundance (c, d) profiles for *PTEN* variants from MT-L (a, c) and MT-H (b, d) CRCs, based on colon versus rectum tumor subsite (left) or sex (center), or age (right). Box plots indicate median (middle line), 25th, 75th percentile (box) and 5th and 95th percentile (whiskers). Shaded areas represent 95% confidence intervals. Sample sizes for the violin plots are provided in Supplementary Tables 21, 22; no significant differences were found by sex, subsite (using Welch's unequal variances t-test and Kolmogorov-Smirnov tests) or age (using regression analysis).

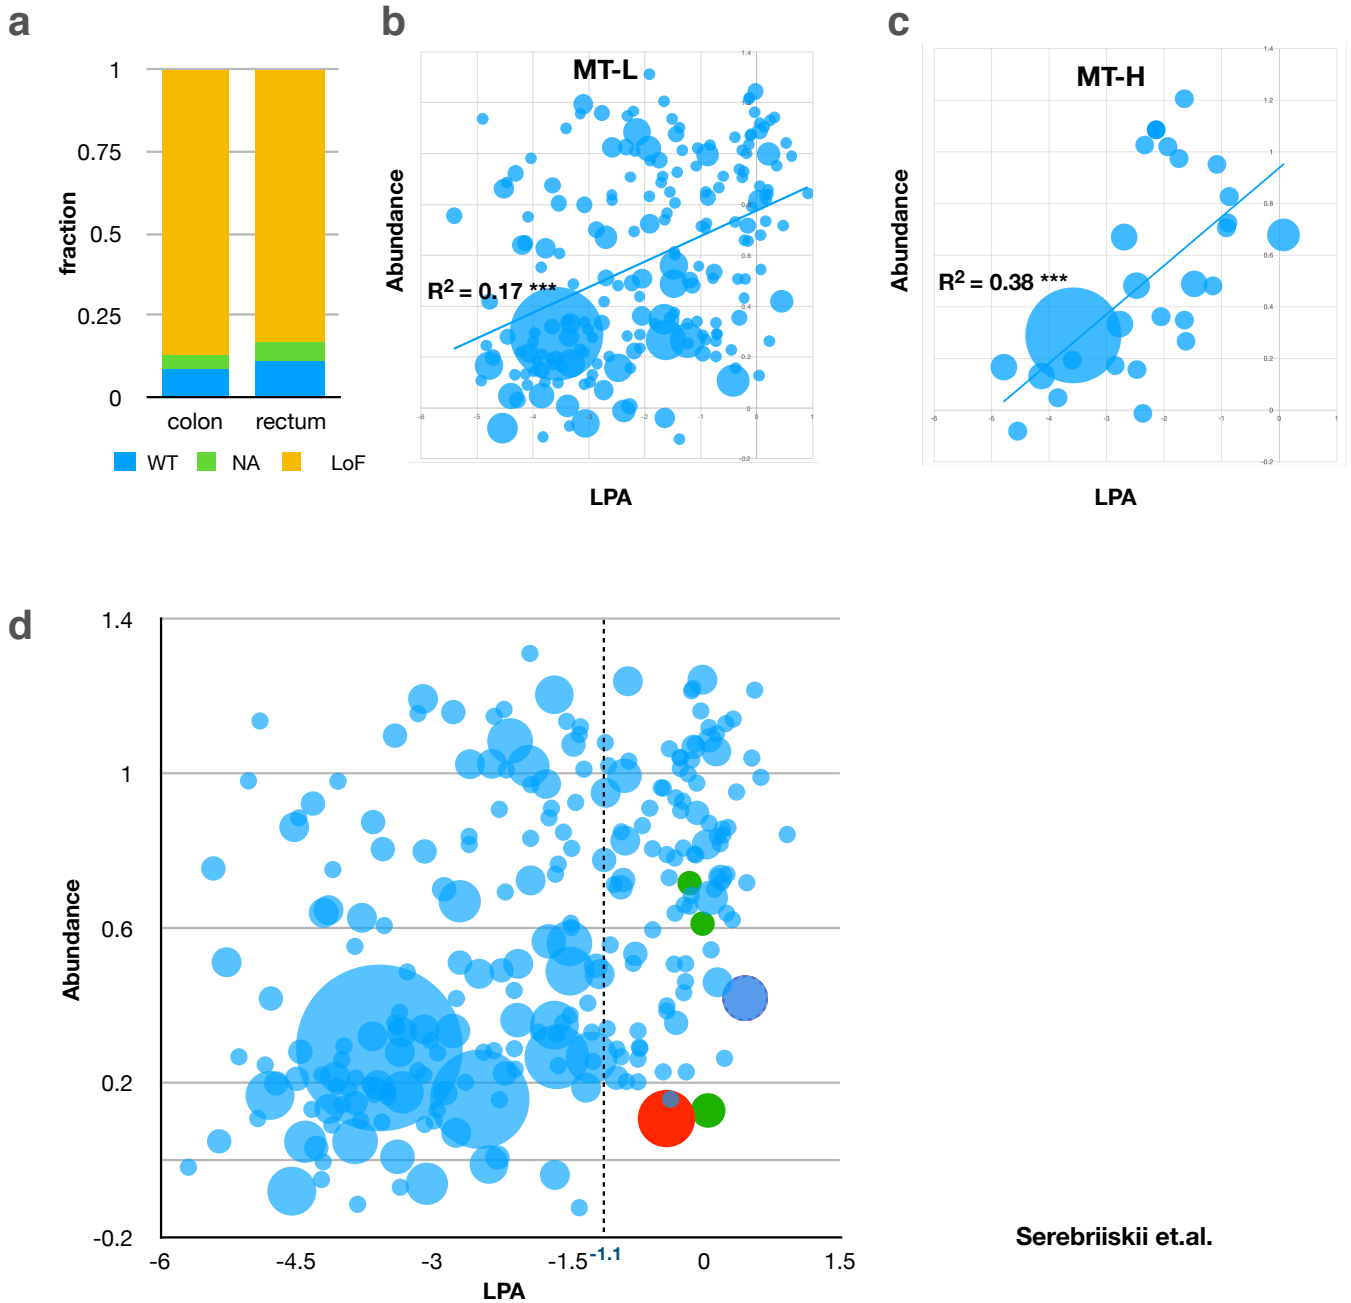

**Supplementary Fig. 11. Frequency of mutations leading to distinct loss of function (LoF) profiles, based on abundance or lipid phosphatase activity (LPA) (related to Fig.6).** **a.** *PTEN* LoF profile based on tumor subsite. WT, wild type; NA, not assigned due to lack of information; LoF, loss of function. Difference in LoF profile is not statistically significant, as determined by chi-squared contingency table test. **b, c.** LPA and abundance (VAMP-seq) profiles in the MT-L (**b**) and MT-H (**c**) subsets of CRC. \*\*\* indicates  $p$ -value  $< 2.2 \times 10^{-16}$  for MT-L subset, and  $1.8 \times 10^{-12}$  for MT-H subset, based on Pearson's product moment correlation coefficient (`cor.test` function in R, two-sided). Source Data are provided as a Source Data file. **d.** Defective activity reported for selected hotspot mutations that do not compromise LPA. *PTEN* Y336\* (red) has reduced abundance but LPA comparable to wt *PTEN*; although this C-terminally truncated *PTEN* mutant does not function as a tumor suppressor, tumors bearing this mutation are sensitive to chemotherapeutic agents, and have altered heterochromatin structure<sup>2</sup>. Multiple mutations at K66 are observed (including K66N, K66T, K66M, shown in green), with different consequences on protein abundance and little effect on LPA. Notably, K27-linked ubiquitination of *PTEN* at K66 converts the protein from a phosphoinositide/Tyr phosphatase to a Ser/Thr phosphatase, suggesting these mutations may be selected based on loss of Ser/Thr activity<sup>3</sup>. Some other mutations with limited effect on LPA, such as a recurring R142W mutation (purple), has been classified as "likely pathogenic" based on reduced ability to rescue the spheroid formation phenotype of normal mammary epithelial cells lacking *PTEN*<sup>4</sup>. For other common mutations, functional significance remains unknown.

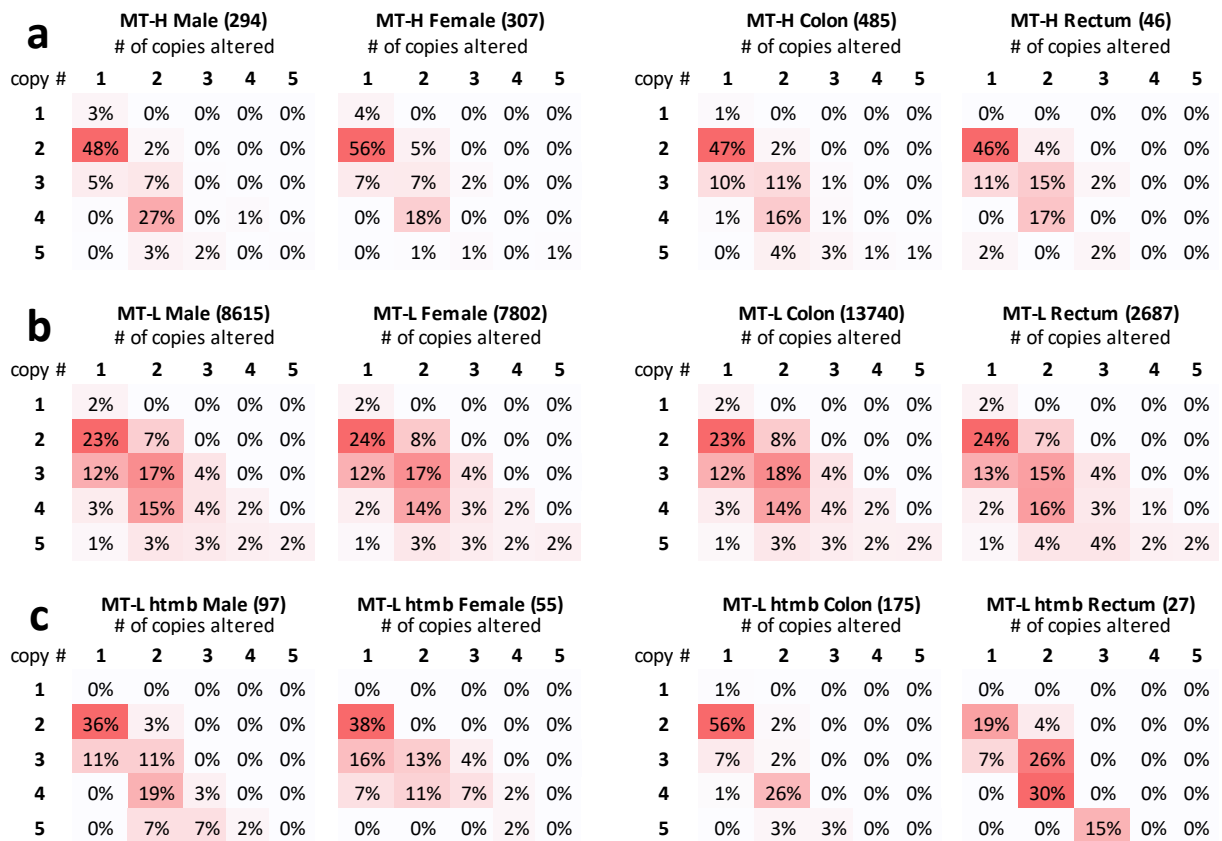

Serebriiskii *et al.*

**Supplementary Fig. 12. Copy number pattern of PTEN mutations by tumor sub-site and sex (related to Fig.7).** **a, b.** For males versus females (**a**) or colon versus rectum subsites (**b**), data indicate co-occurrence of PTEN mutations with altered copy number of PTEN alleles. A value of 1 indicates loss of one allele; values of 3 or higher indicate increased gene copy number. Vertical axis, the estimated total PTEN copy number; on horizontal axis, the estimated copy number for the allele carrying PTEN mutations. Numbers in the cells indicate percent of all mutations with a combination of total/altered copy numbers. Source Data are provided as a Source Data file.

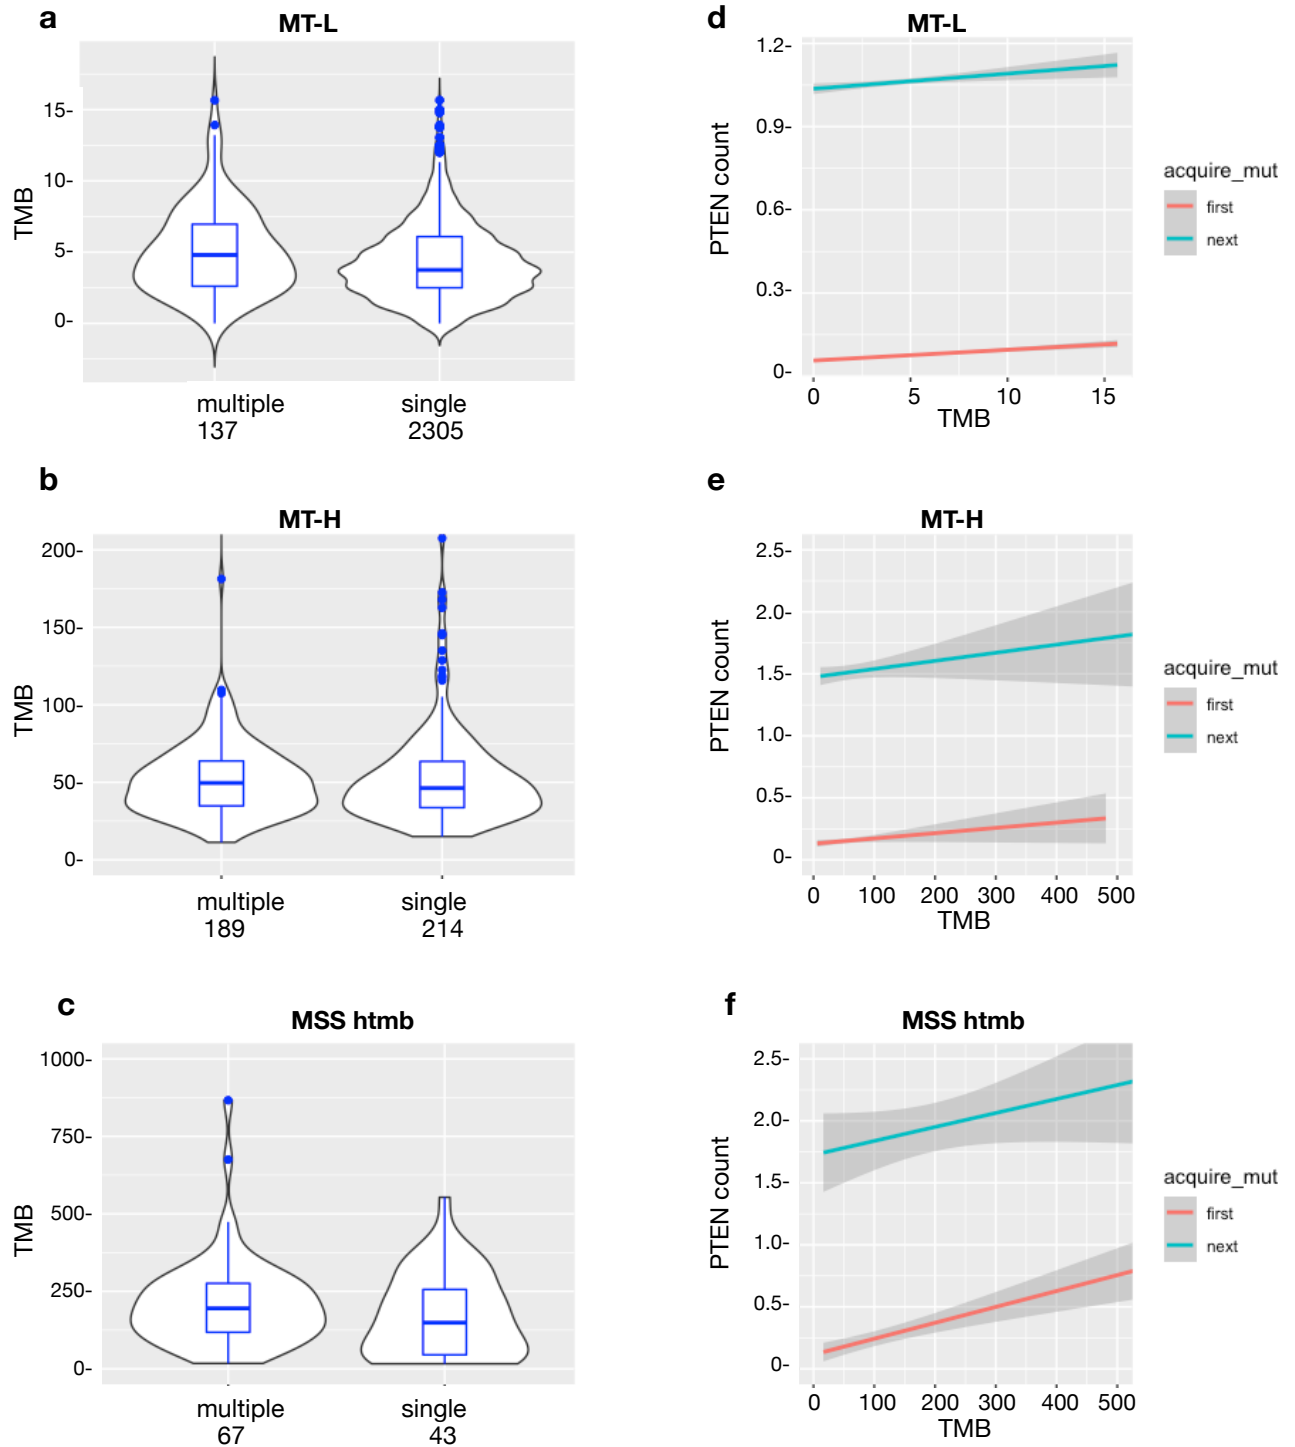

Serebriiskii et.al.

**Supplementary Fig. 13. Relationship between multiplicity of *PTEN* mutations and TMB (related to Fig.7).** **a-c.** Distribution of TMB based on the number of *PTEN* mutations in MT-L, MT-H, or MSS-htmb. No statistically significant difference was found using Welch's unequal variances t-test. Box plots indicate median (middle line), 25th, 75th percentile (box) and 5th and 95th percentile (whiskers). Number of samples for each plot is shown beneath the labels on X-axis. **d-f.** Frequency of *PTEN* alterations as a factor of TMB and multiplicity. Red, single *PTEN* alteration; blue-green, additional *PTEN* alterations. Shaded areas represent 95% confidence intervals. Source Data are provided as a Source Data file.

### Supplementary references

1. Chang MT, *et al.* Accelerating Discovery of Functional Mutant Alleles in Cancer. *Cancer Discov* **8**, 174-183 (2018).
2. Chao JT, *et al.* A Premalignant Cell-Based Model for Functionalization and Classification of *PTEN* Variants. *Cancer Res* **80**, 2775-2789 (2020).
3. Hu Q, *et al.* LncRNAs-directed *PTEN* enzymatic switch governs epithelial-mesenchymal transition. *Cell Res* **29**, 286-304 (2019).
4. Gong L, *et al.* Nuclear *PTEN* tumor-suppressor functions through maintaining heterochromatin structure. *Cell Cycle* **14**, 2323-2332 (2015).
5. Post KL, *et al.* Multi-model functionalization of disease-associated *PTEN* missense mutations identifies multiple molecular mechanisms underlying protein dysfunction. *Nat Commun* **11**, 2073 (2020).
